1 **Regenerative Agriculture Augments Bacterial Community Structure for a Healthier Soil and**  
2 **Agriculture**

3 Indira Singh<sup>1\*</sup>, Meeran Hussain<sup>2</sup>, Manjunath G<sup>1</sup>, Nagasuma Chandra<sup>2</sup>, Ravikanth G<sup>1</sup>

4 1 –Ashoka Trust for Research in Ecology and the Environment (ATREE), Royal Enclave, Srirampura,  
5 Jakkur, Bangalore-560064, India

6 2 – Indian Institute of Science, Bangalore, India

7

8

9

10

11

12 \*For Correspondence

13 Indira Singh: Senior Development Officer,

14 Ashoka Trust for Research in Ecology and the Environment (ATREE)

15 Royal Enclave, Srirampura, Jakkur, Bangalore

16 Karnataka – 560064, India

17 [Indira.singh@atree.org](mailto:Indira.singh@atree.org)

18

## 19 **Abstract**

20 Use of chemical fertilization and pesticides not only harm the environment but also have  
21 detrimental consequences on human health. In recent years, there has been a major emphasis  
22 worldwide on natural agriculture methods. Regenerative agriculture is known across the world  
23 as a combination of nature-friendly farming practices such as no-till, cover cropping, crop-  
24 rotation, agro-forestry and use of organic home-based/ farm-based ingredients to revive soil  
25 health. In India, a number of farmers are slowly adopting these practices using home-based  
26 mixtures and farmyard manure for soil rejuvenation and pest management. In order to evaluate  
27 the efficacy of the regenerative agriculture practices, this study compared conventional and  
28 regenerative agriculture plots for their soil bacterial and nutrient profiles. Two crops - ragi and  
29 vegetable (tomato/beans), and different lengths ( $\leq 3$  and  $> 5$  years) of regenerative practices were  
30 additional metrics considered to understand variabilities due to crop-type and period of  
31 application. We found that all regenerative practices were effective in bringing about an  
32 enrichment for soil bacteria with a more heterogeneous composition. Additionally, the  
33 regenerative vegetable (RV) plots had an enhanced representation of *Actinobacteriota*,  
34 *Chloroflexi*, *Cyanobacteria* and *Patescibacteria* in comparison to conventional vegetable (CV)  
35 plots and Barren land (BL). Similarly, the regenerative ragi (RR) plots saw higher representation  
36 of *Firmicutes* and *Actinobacteriota* in comparison to conventional ragi (CR) plots and BL. The RV  
37 plots were also found to be enriched for Plant Growth Promoting Rhizobacteria (PGPRs) -  
38 *Pseudomonas sp.*, and RR plots were enriched for *Bacillus sp.*, and *Mesorhizobium sp.*, which are  
39 known to play significant roles in vegetable and ragi growth respectively. Interestingly, long-term  
40 regenerative agriculture was able to support good nutrient composition while enhancing Soil

41 Organic Carbon (SOC) levels. In all, the regenerative agriculture practices were found to be  
42 effective in improving bacterial community structure and simultaneously improving soil health.  
43 We found that BL soil with eucalyptus plantation showed least bacterial diversity suggesting  
44 detrimental impact on soil health.

45

46 **Key words:** Regenerative agriculture, conventional agriculture, soil microbiome, soil health, soil  
47 organic carbon

48

## 49 **Introduction**

50 Agriculture is the primary livelihood means for more than 50% of India's population (1). With the  
51 advent of green revolution, farmers used conventional agriculture involving intensive use of  
52 synthetic fertilizers and pesticides for crop and field management (2, 5). Conventional agriculture  
53 with other unsustainable land management practices such as tilling, leaving the soil barren during  
54 non-growing season, agricultural intensification and monoculture cropping have led to the  
55 deterioration of soil quality and crop health, leaving the farmers economically distressed (2, 3).

56 However, there is little scientific evidence regarding the regenerative agricultural practices and  
57 their ability to improve soil and crop health. A healthy soil is supported by a robust and thriving  
58 microbial community, which can carry out a host of biogeochemical activities to enrich the soil  
59 with essential nutrients and plant growth promoters (4, 5, 82). In this study, we compare two  
60 farming systems (regenerative and conventional) based on their soil nutrient and bacterial

61 profiles to verify their abilities in restoring soil health in the context of Karnataka's semi-arid  
62 farmlands.

63 Conventional agriculture, which involves application of chemical fertilizers (Nitrogen, Phosphorus  
64 and Potassium, NPK) for boosting agricultural outputs, has been implicated for acidification and  
65 deterioration of soil and climate change (6). Excessive addition of nitrogen fertilizer brings about  
66 leaching of nitrogen into waterbodies, a major cause of eutrophication apart from accumulation  
67 and release of nitrous oxide from soil, a potent greenhouse gas. In contrast, regenerative  
68 agriculture uses environment friendly soil and crop management systems, which has the ability  
69 to heal the environment cost effectively with minimal inputs (7, 8, 9, 10). This soil management  
70 technique uses a combination of methods such as no-till, cover cropping, crop rotation, multi and  
71 inter-cropping, mulching and farm-based manure application. Overall, regenerative agriculture  
72 uses only naturally available inputs for improving soil health and is proposed to help in mitigating  
73 climate change by enhancing the soil's carbon storage capacity (9, 10).

74 Some of India's smallholder farmers have recently started to adopt regenerative agriculture to  
75 improve their soil and crop health. Alongside using the globally practiced regenerative methods,  
76 smallholders in Karnataka also use soil-rejuvenation methods based on traditional knowledge.  
77 Homemade additives made from cow-products and other easily available ingredients such as  
78 jaggery and chickpea flour. Although, there is a huge repertoire of knowledge accumulating to  
79 show the benefits of regenerative agricultural system, yet there is an ongoing debate on  
80 integrating the two systems to achieve sustainability in food production (7, 9). Consistent with  
81 this idea, many Indian farmers use both chemical fertilizers and farm-based manure for better

82 yield (11, 12). This study attempts to assess the impact of merging the two systems on the soil's  
83 bacterial composition.

84 The soil microbial community is comprised of bacteria, fungi, viruses and protozoans. These  
85 microbes carry out the fundamental processes facilitating-nutrient cycling, decomposition of  
86 organic matter, defining soil texture, soil water-retention capacity, degradation of toxic wastes  
87 and preventing the growth of plant pests and pathogens (13). Different soil treatments can have  
88 an impact on the microbial community structure, but the microbiome changes are very complex  
89 processes stimulated by multiple factors such as temperature, climate, additives/ treatments,  
90 type of crop grown, cropping patterns, etc. Sustainable agriculture practices should ideally boost  
91 the growth and prevalence of beneficial microbes over the pathogenic species. Studies show that  
92 regenerative agriculture manifests soil health by improving soil microbial diversity and richness  
93 (14, 15, 16, 17). However, availability of too many regenerative agriculture options with little  
94 knowledge about their anticipated outcomes, followed by a long time-period for a demonstrable  
95 change in soil health/ plant yield, makes a smallholder farmer desperate and vulnerable.  
96 Therefore, a scientific understanding of the basis of soil health promotion by these practices is  
97 essential for enabling an evidence-based recommendation. Additionally, due to availability of a  
98 broad range of regenerative practices, along with huge variabilities in regional soil types, climatic  
99 conditions, timing and extent of application and differences in crop type and cropping patterns,  
100 it is extremely difficult to compare studies from across the world. Therefore, a region specific and  
101 country specific study would be useful to obtain first-hand information on the mode of action  
102 and benefits accrued. To date there is no such study reported from India to show the comparative  
103 advantage of using regenerative agriculture on soil microbial diversity.

104 Metagenomics analysis using Next Generation High-throughput sequencing of soil DNA samples  
105 has been an efficient tool to determine the microbiome in soil. The technique provides details on  
106 the diversity, abundance and occurrence of specific genera and species in the given sample (15,  
107 18, 19, 20, 21). Here, using 16S metagenomics, we compared the bacterial community structure  
108 under regenerative agriculture with that observed in conventional agriculture and barren land.  
109 Further, the metagenomics datasets were analyzed for alpha and beta diversity to establish the  
110 bacterial diversity in different samples. Agricultural plots growing either vegetable crops  
111 (tomato/bean) or finger-millet crop (Ragi) were considered for this study.

112 We found that agriculture plots following regenerative methods recorded an enhancement in  
113 bacterial diversity, enriched for specific plant growth promoting bacterial genera compared to  
114 conventional agriculture plots and barren land. The results from this study provide strong  
115 evidence to show the significance of regenerative agriculture in boosting soil microbial health to  
116 improve healthy nutrient composition, organic carbon content, water retention property and  
117 consequently induce plant growth and productivity. Our study indicates that long term and  
118 regular use of regenerative farm practices by farmers in Karnataka will have potential to support  
119 sustainability in soil health and agriculture.

120

121

## 122 **Materials and Methods**

### 123 **Soil Sample Collection:**

124 This study aimed to establish the impact of regenerative agriculture practices on soil nutrient  
125 composition and microbial health with respect to the number of years of application. We  
126 considered two types of crops for this study – Ragi (finger-millet) and Tomato/Bean (Vegetable)  
127 crop. Soil sampling was carried out in January and February of 2021 when there was a brief  
128 respite from Covid-19. Therefore, some samples were collected in absence of the crop. Soil was  
129 collected from near the roots of the crops wherever we could find plots with crops and for others  
130 soil was collected at the depth of 1-5 cm from the top. We collected soil from four corners of the  
131 plots and one from the center of the plot. Finally, all the soil samples from one plot were pooled  
132 together for experimentation. For physicochemical analysis, we collected about 2 kg of the soil  
133 pooling soil samples from all the five locations on the plot into one common bag. For the  
134 microbiome study soil was collected in sterile falcon tubes kept on ice and finally stored at -20 °C  
135 until further processing. Soil sampling was done as given in *Table 1*.

136 **Table 1. Soil Sampling**

| Type of Crop | Sample Names                      | Place of Soil Sample Collection | Type of Agriculture | No of Plots | No of Years of Practice | Major Regenerative Agriculture Practices                                  |
|--------------|-----------------------------------|---------------------------------|---------------------|-------------|-------------------------|---------------------------------------------------------------------------|
|              | <i>Con-VP1</i> and <i>Con-VP2</i> | Ramanagara                      | Conventional        | 2           | -                       | Use of NPK fertilizers and chemical pesticides along with farmyard manure |
|              |                                   |                                 |                     |             |                         | Cow dung, vermi-compost, and                                              |

|                             |                 |            |              |   |        |                                                                                                                                                                                             |
|-----------------------------|-----------------|------------|--------------|---|--------|---------------------------------------------------------------------------------------------------------------------------------------------------------------------------------------------|
| Vegetable<br>(Beans/Tomato) | <i>Reg-1VA</i>  | Magadi     | Regenerative | 1 | 1      | Jeevamrutha, crop rotation and inter-cropping; Seed treatment with Beejamritha                                                                                                              |
|                             | <i>Reg-3VP</i>  | Magadi     | Regenerative | 1 | 3      | Farm manure and Jeevamrutha applied twice a year and mixed-cropping and crop rotation; Neem oil for pest control. Seed treatment with <i>Pseudomonas</i> and <i>Trichoderma</i>             |
|                             | <i>Reg-8VP</i>  | Ramanagara | Regenerative | 1 | 8      | Farm manure, and Jeevamrutha applied twice a year, mixed cropping, crop rotation and Beejamritha                                                                                            |
|                             | <i>Reg-10VP</i> | Hosur      | Regenerative | 1 | 10     | 400 kg Farm manure per bed twice a year and Jeevamrutha through drip and spray, mulching and Panchgavya. Crop rotation with legumes. For some seeds <i>Pseudomonas</i> treatment was given* |
|                             | <i>Reg-12VA</i> | Ramanagara | Regenerative | 1 | 10 -12 | 4-5 tons Farm manure and Vermi compost, per year, Jeevamrutha and Microbial Culture added monthly twice during crop growth; multi-cropping with crop rotation; seed treated with            |



|             |                              |               |              |   |   |                                                                                                                                                                                                                                                                         |
|-------------|------------------------------|---------------|--------------|---|---|-------------------------------------------------------------------------------------------------------------------------------------------------------------------------------------------------------------------------------------------------------------------------|
|             |                              |               |              |   |   | Beejamrutha and cow urine                                                                                                                                                                                                                                               |
| Ragi        | <i>Con-RA1 &amp; Con-RA2</i> | Doddaballapur | Conventional | 2 | - | Use of NPK fertilizers and chemical pesticides alone. No other supplementation                                                                                                                                                                                          |
|             | <i>Reg-1RA</i>               | Magadi        | Regenerative | 1 | 1 | farm manure and green manure, mulching; natural insecticide for pest management                                                                                                                                                                                         |
|             | <i>Reg-7RA</i>               | Ramanagara    | Regenerative | 1 | 7 | cow dung, jaggery, Vermi-compost, Jeevamrutha; A special organic pesticide + cow urine spray for pest management; crop rotation with legumes, crop rotation; seed treatment with Beejamrutha, cow dung, jaggery and calcium for seed treatment; organic pest management |
|             | <i>Reg-8RA</i>               | Ramanagara    | Regenerative | 1 | 8 | Farm manure, green leaves manure and Jeevamrutha applied twice a year; crop rotation with leguminous crops; seed treatment with cow urine; pest management also with cow urine and natural pesticide                                                                    |
| Barren Land | <i>BL-Euc &amp; BL</i>       | Doddaballapur | -            | 2 | - | No treatment                                                                                                                                                                                                                                                            |

137 Note: In the provided names the following nomenclature has been followed –

138 *Reg* - Regenerative; *Con* - Conventional; *BL* - Barren Land. *V* - Vegetable; *R* - Ragi; *P* - soil sampling in Presence  
 139 of crop; and *A* - soil sampling in Absence of the crop; and the numbers after the hyphen indicate the number  
 140 of years of Regenerative agriculture practice.

141 Jeevamrutha – composed of soil, chickpea flour, jaggery, cow dung and cow urine; Panchagavya – composed  
 142 of milk, butter, curd, cow dung and cow urine; Beejamrutha – comprises of cow dung, cow urine, soil and lemon  
 143 juice.

144

145 We selected the plots for this study in the outskirts of Bengaluru in the towns of Ramanagara,  
 146 Magadi, Doddaballapur and Hosur. This region is predominantly semi-arid. Barren land (BL)  
 147 samples with no vegetation and with eucalyptus formed the no treatment controls. Barren land  
 148 with eucalyptus (*BL-Euc*) was included as an additional metric in the study to get a sense of how  
 149 monocultures impact soil health. The regenerative plots varied greatly in the kind of application  
 150 practiced. For instance, some farmers used farmyard manure and Jeevamrutha, while others  
 151 used farmyard manure, Jeevamrutha along with vermicompost (*Table 2*).

152 **Table 2. Physicochemical Parameters of the Soil Samples**

| Sample Name     | pH             | EC (dS/m)       | Organic carbon (%) | Nitrogen       | Phosphorus        | Potassium      | Calcium        | Magnesium      | Zinc           | Manganese      | Iron             | Copper         |
|-----------------|----------------|-----------------|--------------------|----------------|-------------------|----------------|----------------|----------------|----------------|----------------|------------------|----------------|
|                 |                |                 |                    | kg/ha          |                   |                | mEq/1000 g     |                | ppm            |                |                  |                |
| <b>IDEAL</b>    | <b>6.5-7.5</b> | <b>&lt;1.00</b> | <b>0.5-0.75</b>    | <b>280-560</b> | <b>22.9-56.33</b> | <b>141-336</b> | <b>&gt;1.5</b> | <b>&gt;1.0</b> | <b>&gt;0.6</b> | <b>&gt;2.0</b> | <b>2.5 - 4.5</b> | <b>&gt;0.2</b> |
| <i>Con-VP1</i>  | 7.54           | 0.367           | 0.39               | 131.8          | 342.47            | 250.3          | 38             | 21             | 3.72           | 7.2            | 35.64            | 1.17           |
| <i>Con-VP2</i>  | 7.6            | 0.399           | 0.44               | 106.6          | 346.28            | 284.4          | 41             | 27             | 4.77           | 7.68           | 11.31            | 0.84           |
| <i>Reg-1VA</i>  | 7.41           | 0.113           | 0.29               | 125.4          | 87.64             | 217.9          | 35             | 19             | 1.23           | 6.33           | 13.32            | 0.42           |
| <i>Reg-3VP</i>  | 7.43           | 0.193           | 0.3                | 156.8          | 62.39             | 184            | 40             | 30             | 4.44           | 3.99           | 32.16            | 1.56           |
| <i>Reg-8VP</i>  | 8.31           | 0.267           | 0.36               | 120.1          | 152.8             | 189.7          | 62             | 47             | 2.34           | 6.27           | 8.79             | 0.72           |
| <i>Reg-10VP</i> | 7.95           | 0.279           | 0.51               | 144.2          | 510.13            | 506.4          | 105            | 64             | 4.08           | 8.34           | 19.62            | 2.19           |

|                 |          |       |      |       |            |       |    |    |      |       |       |       |
|-----------------|----------|-------|------|-------|------------|-------|----|----|------|-------|-------|-------|
| <i>Reg-12VA</i> | 7.7<br>1 | 0.231 | 0.32 | 100.3 | 187.3<br>3 | 223.5 | 79 | 54 | 2.79 | 9.42  | 16.53 | 0.81  |
| <i>Con-RA1</i>  | 5.7<br>9 | 0.316 | 0.35 | 131   | 37.6       | 334   | 14 | 6  | 1.32 | 10.8  | 16.56 | 0.45  |
| <i>Con-RA2</i>  | 3.9<br>4 | 0.159 | 0.39 | 144   | 44.7       | 170   | 21 | 10 | 1.14 | 18.63 | 78.27 | 1.5   |
| <i>Reg-1RA</i>  | 7.3<br>5 | 0.128 | 0.38 | 106.6 | 58.58      | 216.6 | 58 | 32 | 1.05 | 11.01 | 10.32 | 0.51  |
| <i>Reg-7RA</i>  | 6.8<br>9 | 0.09  | 0.36 | 119.1 | 148.6<br>1 | 252.7 | 45 | 28 | 2.58 | 14.58 | 36.18 | 1.56  |
| <i>Reg-8RA</i>  | 7.0<br>1 | 0.13  | 0.42 | 125.4 | 60.01      | 306.7 | 54 | 38 | 2.37 | 16.02 | 23.13 | 0.57  |
| <i>BL- Euc</i>  | 6.0<br>4 | 0.235 | 0.31 | 119   | 29         | 242   | 27 | 14 | 1.51 | 23.91 | 9.3   | 0.459 |
| <i>BL</i>       | 5.8<br>5 | 0.106 | 0.41 | 150   | 14.7       | 108   | 22 | 9  | 0.99 | 6.33  | 16.29 | 0.327 |

153 Note: The ideal values are based on recommendations given by the Indian Society of Soil Science (31).

154

155 Sample grouping into categories for analysis:

- 156 • two conventional vegetable (CV) plots – *Con-VP1* & *Con-VP2*
- 157 • two conventional ragi (CR) plots – *Con-RA1* & *Con-RA2*
- 158 • two regenerative ( $\leq 3$  years) vegetable (RV) plots – *Reg-1VA* & *Reg-3VP*
- 159 • three regenerative ( $> 5$  years) vegetable (RV) plots – *Reg-8VP*, *Reg-10VP* & *Reg-12VA*
- 160 • one regenerative ( $\leq 3$  years) ragi (RR) plot – *Reg-1RA*
- 161 • two regenerative ( $> 5$  years) ragi (RR) plots – *Reg-7RA* & *Reg-8RA*
- 162 • two barren land samples – *BL* (no vegetation) & *BL-Euc* (with Eucalyptus)

163 **Soil Physicochemical Analysis:**

164 Collected soil samples were taken to the laboratory, shade dried, pounded using wooden pestle  
 165 and mortar, sieved (2 mm) and stored in airtight polyethylene bags for further analysis. The soil

166 samples were analysed for various electrochemical properties. The soil pH, electrical  
167 conductivity, organic carbon content, nutrients namely - nitrogen, phosphorus, potassium,  
168 calcium, magnesium, sulphur and micronutrients - iron, zinc, manganese and copper were  
169 analyzed according to the standard procedures as given in *Table 3*.

170 **Table 3. Methods adopted for soil analysis**

| Sl. No. | Parameter                                                     | Method                                      |
|---------|---------------------------------------------------------------|---------------------------------------------|
| 1.      | Soil reaction (pH)<br>(1:2.5 soil: water suspension)          | Potentiometry (22)                          |
| 2.      | Electrical conductivity<br>(1:2.5 soil: water suspension)     | Conductometry (22)                          |
| 3.      | Organic carbon (%)                                            | Wet oxidation (23)                          |
| 4.      | Available Nitrogen (kg ha <sup>-1</sup> )                     | Macro kjeldahl<br>Distillation (24)         |
| 5.      | Available Phosphorus (kg ha <sup>-1</sup> )                   | Spectrophotometry (25)                      |
| 6.      | Available Potassium (kg ha <sup>-1</sup> )                    | Flame photometry (22)                       |
| 7.      | Exchangeable Calcium and<br>Magnesium (mEq/1000 g)            | Complexometric titration (22)               |
| 8.      | Available Sulphur (ppm)                                       | Turbidometry (22)                           |
| 9.      | DTPA extractable Iron,<br>Manganese, Zinc and Copper<br>(ppm) | Atomic Absorption<br>Spectrophotometry (26) |

171

172

173 **Soil DNA Isolation, library preparation and deep sequencing:**

174 DNA was isolated from the soil samples using DNeasy Power soil kit, following manufacturer's  
175 protocol. DNA samples were sent for 16S metagenomics analysis to Eurofins, where amplicon  
176 sequencing was done using Illumina MiSeq platform (Eurofins Genomics India Pvt. Ltd.,

177 Bangalore, India). The quality of the DNA samples was checked using NanoDrop estimation by  
178 determining A260/280 ratio. The amplicon libraries were prepared using Nextera XT Index Kit  
179 (Illumina inc.) as per the 16S Metagenomic Sequencing Library preparation protocol (Part #  
180 15044223 Rev. B). Primers for the amplification of the bacterial 16S V3-V4 region were designed  
181 and synthesized at Eurofins Genomics Lab. Amplification of the 16S gene was carried out. The QC  
182 passed amplicons with the Illumina adaptor were amplified using i5 and i7 primers that add  
183 multiplexing index sequences as well as common adapters required for cluster generation (P5  
184 and P7) as per the standard Illumina protocol. The amplicon libraries were purified by AMPure  
185 XP beads and quantified using Qubit Fluorometer. The amplified and AMPure XP bead purified  
186 libraries were analyzed on 4200 Tape Station system (Agilent Technologies) using D1000 Screen  
187 tape as per manufacturer's instructions. After obtaining the mean peak sizes from Tape Station  
188 profile, libraries were loaded onto MiSeq at appropriate concentration (10-20 pM) for cluster  
189 generation and sequencing. Paired-end sequencing allows the template fragments to be  
190 sequenced in both the forward and reverse directions on MiSeq. Kit reagents were used for  
191 binding the samples to complementary adapter oligoes on paired-end flow cell. The adapters  
192 were designed to allow selective cleavage of the forward strands after re-synthesis of the reverse  
193 strand during sequencing. The copied reverse strand was then used to sequence from the  
194 opposite end of the fragment.

#### 195 **Metagenomics Analysis:**

196 In all, there were 14 samples and the number of read pairs ranged from 100,468 to 341,993 per  
197 sample. Quality check of 16s rRNA sequences was done using FastQC (v0.11.5) and the adapter  
198 sequences were removed using Trimgalore (version: 0.6.7) (27, 28). The complete metagenome

199 analysis was done using the QIIME 2.0 (Quantitative Insights in to Microbial Ecology) (version:  
200 2021.4.0) pipeline (29). De-noising of the paired-end reads was done using the DADA2 tool that  
201 is within QIIME 2.0 which is used to filter low-quality reads of Phred score <15. High-quality reads  
202 were retained in 16S rRNA sequences by truncating the length of the forward read to 285 bp and  
203 the reverse reads to 250 bp. The resulting reads were de-noised to obtain unique sequence  
204 variants. DADA2 (version: 2021.4.0) produces "operational taxonomic units (OTUs)" by grouping  
205 unique sequences; these are 100% equivalent to the OTUs and are referred to as "Amplicon  
206 Sequence Variants (ASVs)". The feature table was constructed using QIIME 2.0, which is similar  
207 to the BIOM table and the representative sequence file.

208 Further, the phylogenetic tree was built for each sample using the MAFT program, which is an  
209 inbuilt plugin in the QIIME 2.0 pipeline, results from this program are used to study the Alpha  
210 diversity by using Faith's Phylogenetic and Pielou's evenness matrix. Alpha diversity is further  
211 explored as a function of sampling depth by performing Alpha Rarefaction. Taxonomic  
212 classification was done by mapping the sequences at 99% sequence identity to an optimized  
213 version of the SILVA database using Naive Bayes classifier and q2-feature-classifier plugin of  
214 QIIME 2.0. The results of each step were downloaded from the QIIME2 program and they were  
215 plotted using ggplot2 (3.3.5) with R programming language (29).

216

## 217 **RESULTS**

### 218 **Soil's organic carbon and major nutrient composition**

219 The physicochemical properties of soil such as - pH, major and minor nutrient composition  
220 obtained in the study were compared with pre-defined ideal values (given in Table 3). The results

221 from the soil physicochemical analysis show that except *Con-RA2* (pH = 3.94), *Con-RA1* (pH =  
222 5.79), *BL* (pH = 5.85) and *BL-Euc* (pH = 6.04), all other samples had pH either in the ideal range  
223 (6.5- 7.5) or in the moderately alkaline range (31).

224 For most parameters, there was no significant difference between the conventional and  
225 regenerative agriculture plots. For instance, nitrogen levels were observed to be much less than  
226 the required range of 280 – 560 kg/ha in all the plots. Phosphorus levels were much above the  
227 required range of 22.9 – 56.3 kg/ha, while potassium was in the ideal range (141- 3663 kg/ha) in  
228 all the soil samples. An important finding was that phosphorus and potassium are present at very  
229 high levels in *Reg-10VP* soil with the use of only organic manure. The *Reg-10VP* plot uses very  
230 heavy application of cattle manure and other household+ farm-based mixture and has been using  
231 these practices for as long as 10 years. It would be interesting to study how cattle manure and  
232 each of these practices individually contribute to soil's phosphorus and potassium content.  
233 Additionally, *Reg-10VP* also showed the best organic carbon composition of 0.51% (ideal – 0.5 –  
234 0.75%), unlike all other soil samples which remained below the ideal range. In contrast, the other  
235 regenerative agriculture plots in this study did not seem to show such a remarkable enhancement  
236 in their nutrient profiles when compared with the conventional agriculture soil. However, most  
237 regenerative plots have desired levels of most macro- and micronutrients barring nitrogen and  
238 organic carbon levels. This clearly indicates that most of these regenerative soil treatments  
239 regimens have the ability to provision maximum of these nutrients even in the absence of  
240 inorganic additives.

241 Further investigations will be needed to establish the basis for the improved physicochemical  
242 profiles in *Reg-10VP* soil. Altogether, these findings suggest that the long-term application of

243 regenerative practices could help to improve the soil's nutrient composition including organic  
244 carbon levels.

### 245 **Taxonomic composition of soil microbial community**

246 To identify the bacterial community structure associated with conventional versus regenerative  
247 practices, we performed 16S metagenomics studies. A total of 2,941,473 raw sequence reads  
248 from 14, 16S metagenome libraries were generated by the Illumina platform, ranging from  
249 1,51,169 to 3,41,993 reads per sample. After removal of adapter sequences, ambiguous reads  
250 (reads with unknown nucleotides "N" larger than 5%), and low-quality sequences (reads with QV  
251 <20 phred score) and a minimum length of 100 bp, 2,801,991 high quality clean reads were  
252 further used for analysis.

253 The datasets were analyzed with QIIME 2.0 pipeline, using the SILVA database. At phylum level,  
254 Proteobacteria, Bacteroidota, Planctomycetota, Cyanobacteria, Actinobacteriota, Chloroflexi,  
255 Acidobacteriota, Verrucomicrobiota, Firmicutes and Gemmatimonadetes are the top 10  
256 predominant phyla.

257 **Bacterial richness and community heterogeneity:** Soil samples were classified into following  
258 groups for this analysis –

- 259 (i) Barren (comprising *BL* and *BL-Euc*);
- 260 (ii) Conv (Vegetable plots- *Con-VP1* and *Con-VP2*) and (Ragi plots - *Con-RA1* and *Con-RA2*);
- 261 (iii) Reg≤3 (Vegetable plots - *Reg-1VA* and *Reg-3VP*) and (Ragi plots – *Reg-1RA*);
- 262 (iv) Reg>5 (Vegetable plots – *Reg-8VP*, *Reg-10VP* and *Reg-12VA*) and (Ragi plots – *Reg-*  
263 *7RA* and *Reg-8RA*)



264 For both crop types (vegetable and ragi), we found that regenerative agriculture plots in general  
265 showed higher bacterial richness compared to conventional and barren (*Figure 1a, 1c*).  
266 Furthermore, bacterial species evenness comparison showed that both regenerative vegetable  
267 (RV) and regenerative ragi (RR) plots displayed least species evenness implying that the species  
268 composition in these plots is highly heterogeneous (*Figure 1b, 1d*). Surprisingly, CR plots showed  
269 least bacterial richness (*Figure 1c*) which was even less than that observed in the BL soil, whereas  
270 CV soil demonstrated better bacterial richness than BL samples (*Figure 1a*). On a similar note, CR  
271 plots had the highest species evenness followed by BL plots (*Figure 1d*), while CV plots had lower  
272 species evenness than BL (*Figure 1b*). Our findings indicate that regenerative agriculture  
273 increases soil's bacterial richness and heterogeneity irrespective of crop type and the kind of  
274 regenerative practices adopted.

275 **Alpha diversity:** The alpha diversity among different soil samples was compared to determine  
276 the mean species diversity in each plot. A higher alpha diversity value therefore signifies a more  
277 diverse pool of bacterial species accumulation. It is important to point out here that we collected  
278 a few soil samples from regenerative plots in the presence of vegetable crops labeled with the  
279 suffix *VP*, in the presence of ragi are labeled as *RP* and those taken post-harvest are labeled with  
280 the suffix *VA and RA* respectively. While all CV plot soils were collected in the presence of the  
281 crop, all CR plot soils were collected in the absence of the crop.

282 Overall, the alpha diversity study showed that most regenerative agriculture plots demonstrated  
283 higher alpha diversity compared to conventional agriculture plots and barren soil (*Figure 2a, 2b*).  
284 Among vegetable plots our results indicate that alpha diversity is directly proportional to the  
285 length of regenerative agricultural practice. For example, the bacterial diversity in soil from

286 vegetable regenerative plot practicing for 10 years (*Reg-10VP*) was greater than that observed  
287 for the plot practicing for 8 years (*Reg-8VP*) (*Figure 2A*). Likewise, among the post-harvest  
288 category, we observed greater bacterial diversity in *Reg-12VA* (12 years) as compared to *Reg-*  
289 *1VA* (1 year) (*Figure 2a*). Surprisingly, and in contrast to time-dependency, *Reg-3VP* (3 years)  
290 showed a better alpha diversity than *Reg-8VP* (8 years). We believe that this variability is due to  
291 the inherent differences in the soil quality associated with various locations. As expected, soil  
292 collected from RA plots where vegetable crops were present showed greater diversity than RA  
293 soil samples collected post-crop harvest (*Figure 2a*).

294 Another interesting observation was that *Con-VP2* soil, which is exposed to a combination of  
295 conventional and regenerative practices, displayed bacterial diversity comparable to that  
296 observed in *Reg-12VA* (*Figure 2A*). This result is significant as it shows that despite merging two  
297 agricultural methods and soil sampling done in presence of crop, yet *Con-VP2* had bacterial  
298 diversity only as good as *Reg-12VA* where soil was taken in the absence of crop. Thus, a definitive  
299 augmentation in soil bacterial speciation is observed in the plots selectively practicing  
300 regenerative agriculture.

301 In contrast to vegetable plots, soil from the ragi growing plots could only be collected post-  
302 harvest. It is noteworthy that the CR plots displayed as poor bacterial diversity as was found in  
303 *BL-Euc* (*Figure 2b*). Least bacterial diversity in these CR plots could be due to the degradative  
304 impact of conventional fertilization on the soil's microbial health or due to continuous cultivation  
305 with no supportive interventions or due to the inherently poor soil quality of Doddaballapur from  
306 where these soils were obtained. Interestingly, while RR plots showed better bacterial diversity  
307 than CR, the duration of regenerative practices did not correlate with the bacterial species

308 enrichment. For example, *Reg-1RA* (practicing for 1 year) displayed higher bacterial diversity than  
309 *Reg-7RA* (practicing for 7 years). Surprisingly, *Reg-8RA* (practicing for 8 years) displayed bacterial  
310 diversity lower than even the *BL* plot. One explanation could be that at different places the  
311 starting soil will have different baselines of bacterial diversity. The sample *Reg-1RA* was collected  
312 from Magadi while *Reg-7RA* and *Reg-8RA* were obtained from Ramanagara. It seems that Magadi  
313 soil is already healthier than soil from other places owing to its mostly green-covered scape and  
314 a more recent agricultural shift in the region compared to Ramanagara, Doddaballapur, and  
315 Hosur. Therefore, soil in other places demand higher inputs to be rejuvenated compared to  
316 Magadi soil. This argument is strengthened by the finding that *Reg-3VP* (*Figure 2a*) also coming  
317 from Magadi shows a bacterial profile as rich as that observed in *Reg-10VP* plot in just three years  
318 of regenerative agriculture practice.

319 **Bacterial community:** To elucidate the bacterial community structure in the various types of  
320 plots, we assessed and compared the bacterial phyla associated with different soil samples  
321 grouped into categories as described previously in bacterial richness and heterogeneity analysis.  
322 The major phyla observed in both kinds of vegetable plots and Barren soil included –  
323 Proteobacteria, Bacteroidota, Planctomycetota, Acidobacteriota, Chloroflexi, Actinobacteriota,  
324 Verrucomicrobiota, Cyanobacteria and Patescibacteria (*Figure 3a*). Similarly, in ragi plots and  
325 barren soil comparison the bacterial community was majorly represented by the phyla –  
326 Planctomycetota, Proteobacteria, Bacteroidota, Chloroflexi, Actinobacteriota, Acidobacteriota,  
327 Cyanobacteria, Verrucomicrobiota, Firmicutes, Patescibacteria, Myxococcota and  
328 Gemmatimonadota (*Figure 3b*). Our observations show that in regenerative agriculture plots  
329 there is a shift towards a more uniform representation of all the major phyla compared to that

330 in conventional agriculture plots. For instance, on analysis of vegetable plots (*Figure 3a*), we see  
331 a slight reduction in the relative abundance of phyla Proteobacteriota (Barren – 16.88%, Conv –  
332 17.45% to Reg $\leq$ 3 – 16.62% and Reg $>$ 5 – 15.26%) and Acidobacteriota (Barren –9.62% Conv –  
333 9.88% to Reg $\leq$ 3 – 8.78% and Reg $>$ 5 – 7.42%) and a simultaneous increased representation of  
334 phyla – Chloroflexi (Barren – 8.75%, Conv – 6.63% to Reg $\leq$ 3 – 9.11% and Reg $>$ 5 – 9.64%),  
335 Actinobacteriota (Barren – 7.02%, Conv – 6.25% to Reg $\leq$ 3 – 7.80% and Reg $>$ 5 –7.15%),  
336 Cyanobacteria (Barren – 7.70%, Conv – 1.14% to Reg $\leq$ 3 – 7.72% and Reg $>$ 5 – 4.47%) and  
337 Patescibacteria (Barren – 2.31%, Conv – 5.96% to Reg $\leq$ 3 – 4.81% and Reg $>$ 5 – 6.73%) in  
338 regenerative soil compared to conventional and barren soil. This reorganization has led to the  
339 development of a more evenly structured community. Similarly, in the raji plots (*Figure 3b*) we  
340 observed relatively lower levels of Acidobacteriota (Barren – 9.79%, Conv – 7.39% to Reg $\leq$ 3 –  
341 6.81% and Reg $>$ 5 – 7.02%) and higher levels of Actinobacteriota (Barren – 7.15%, Conv – 7.08%  
342 to Reg $\leq$ 3 – 8.94% and Reg $>$ 5 – 14.12%) and Firmicutes (Barren – 1.89%, Conv – 2.37% to Reg $\leq$ 3  
343 – 8.01% and Reg $>$ 5 – 2.89%). Interestingly, a comparison to determine the impact of number of  
344 years of regenerative agriculture among RV plots did not show a significant change in the phylum  
345 level distribution in Reg  $\leq$ 3 and Reg  $>$ 5 soils. Although the comparison of RR plots (Reg  $>$ 5 and  
346 Reg =1) (*Figure 3b*) showed a significantly higher representation of Firmicutes in Reg =1 soil  
347 despite only one year of regenerative practice. This is supposedly attributed to the regionally  
348 better soil of Magadi obtained Reg =1 soil (*Reg-1RA*). However, the RR plots practicing for Reg  $>$ 5  
349 years were found to show a significantly enhanced relative abundance of Actinobacteriota.

350 **PGPR community structure in regenerative agriculture:** Plant Growth promoting Rhizobacteria  
351 (PGPR) are characterized to be an important group of soil bacteria that support plant growth and

352 health by synthesizing and secreting various beneficial chemicals and nutrients in the soil. To  
353 determine the soil health in terms of PGPR representation, we selected a group of bacterial  
354 genera that have been well identified and classified as PGPRs (35, 36, 37, 38, 17). Among the  
355 genera considered here are – *Flavobacterium*, *Bacillus*, *Streptomyces*, *Mesorhizobium*,  
356 *Achromobacter*, *Klebsiella*, *Paenibacillus*, *Burkholderia* and *Pseudomonas*. Interestingly, RV plots  
357 when compared to CV and barren plot soils showed a relative enrichment for *Pseudomonas sp.*  
358 belonging to phylum Proteobacteria. On the contrary, RR plots demonstrated an increased  
359 representation of - *Bacillus sp.* and *Mesorhizobium sp.* The levels of *Bacillus sp.* are found to be  
360 significantly higher in both RR categories (Reg >5 and Reg = 1) compared to CR and barren land.  
361 The relative representation of *Mesorhizobium sp.* was found to be highest in Reg >5 in RR plots  
362 with a simultaneous reduction in levels of *Burkholderia sp.* compared to both CR and barren soil  
363 (*Figure 4b*). Interestingly, the genus *Streptomyces* was found to have a remarkably high  
364 representation in all Magadi plots (*Reg-1RA*, *Reg-1VA* and *Reg-3VP* compared to the other plots  
365 (*Figure 4a, 4b*). However, since we did not have any conventional plot or barren soil sample from  
366 Magadi it is impossible to estimate the contribution of RA on the enhanced *Streptomyces*  
367 configuration.

368

## 369 **Discussion**

370 Regenerative agriculture has re-emerged in the last ten years (39) as a very important means of  
371 land rejuvenation practice for sustainability in soil health, farm productivity and environmental  
372 management. Regenerative agriculture provides us with a non-synthetic, nature-based option

373 that helps to revive the ecosystem as a whole. In India too, there is growing interest in this  
374 environmentally-safe and less expensive agriculture system, necessitating the need for  
375 elucidating its impact on soil, environment and food production as a whole. Thus, this study has  
376 attempted to decipher the impact of regenerative agriculture on soil bacterial profile, soil  
377 nutrient composition, in two cropping systems under short ( $\leq 3$  years) and long-term ( $> 5$  years)  
378 influence.

379 **Soil Chemical Properties** - Most soil samples were found to have ideal pH or a somewhat alkaline  
380 pH, which is mostly suitable for agriculture. Acidic pH was found in the soil samples coming from  
381 Doddaballapur – *BL*, *BL-Euc*, *Con-RA1* and *Con-RA2*. These findings are consistent with reports  
382 showing that soil from Doddaballapur generally has an acidic pH in the range from 5.0 to 7.3 (40).  
383 Highest acidity in *Con-RA1* and *Con-RA2* soils are likely due to application of synthetic fertilizers  
384 and continued cultivation without allowing the land time to revive itself (41). As per the USDA,  
385 soils with pH below 5.5 are likely to have poor calcium, magnesium and phosphorus content (32).  
386 Consistent with this, *Con-RA2* with  $\text{pH} < 5.5$  and *Con-RA1* exhibiting pH around 5.5 showed low  
387 levels of calcium, magnesium and phosphorus. We further observed that soil samples with pH  
388 values above 7.8 have adequate calcium and magnesium levels but depleted copper, manganese  
389 and iron content. This was found to be somewhat true for the samples – *Reg-10VP* ( $\text{pH} = 7.95$ )  
390 and *Reg-8VP* ( $\text{pH} = 8.31$ ) where calcium and magnesium levels are in surplus, whereas copper is  
391 much above the ideal limit of 0.2 ppm. Most regenerative agriculture plots were found to have  
392 ideal or slightly alkaline pH levels.

393 High phosphorus levels in conventional agriculture plots (*Con-VP1* and *Con-VP2*) is most likely  
394 attributed to the excessive chemical - NPK fertilization where phosphorus and potassium remain

395 in the soil over time whereas nitrogen gets lost due to leaching and nitrogen cycling (42, 43, 44).  
396 Available literature shows that as soil degrades there is a simultaneous decline in the composition  
397 of all its nutrients (45). However, since the BL soils considered in this study did not show a marked  
398 reduction in any of the nutrients, therefore these soils may not be suitably classified as degraded.  
399 Although, it may be interesting to study the microbial health and nutrient composition of these  
400 soils in a span of 3-5 years from now, to observe the changes in the barren soil composition to  
401 estimate the progression of degradation.

402 **Bacterial richness and diversity** - As shown by multiple studies from across the world, we found  
403 that regenerative agricultural system improves bacterial diversity compared to both conventional  
404 and barren soil (47, 49, 50, 55, 56, 14). Here we report an increase in bacterial richness and  
405 heterogeneity across all regenerative plots, including those that have moved to this system very  
406 recently. This is a very significant result indicating that application of regenerative agriculture,  
407 from the outset boosts and modulates the soil's bacterial growth, promoting a more  
408 heterogeneous composition for carrying out various soil health enhancing activities. Another  
409 important finding from the alpha diversity comparison of vegetable plots is that longer the period  
410 of RA application greater is the community's bacterial diversity. These findings confirm the  
411 biological enrichment abilities of regenerative agriculture (6, 10).

412 The demonstrated lower alpha diversity among RA plots with no crops during soil sampling versus  
413 those with crops underpins the fact that roots of the crops induce proliferation of a large variety  
414 of root colonizing and plant growth stimulating rhizosphere microbes (33, 34). Although the RR  
415 plots also showed the highest alpha diversity compared to CR and BL, yet a reverse time-  
416 dependence trend was observed among the ragi RA plots. This could be attributed to the soil

417 sampling done in the absence of crop and the regional differences contributing to a dis-  
418 proportional decline in microbial community profiles. In addition, inherent regional soil  
419 characteristics and composition may also play a significant role in shaping the microbial  
420 community structure (50). This is evident from the Magadi obtained soils - *Reg-3VP* and *Reg-1RA*,  
421 which displayed highest alpha diversity in their respective groups (*Figure 2a, 2b*).

422 Among all the RA plots in this study *Reg-10VP* was observed to show the best overall profile in  
423 terms of both bacterial community structure as well as soil physicochemical characteristics.  
424 Looking at the nutrient and bacterial profile of sample *Reg-10VP*, one can construe that  
425 continued regenerative practice over five years or more has the capability to improve the soil's  
426 bacterial community structure, which would in turn enhance soil and plant health. We know from  
427 the farmer interviews that *Reg-10VP* has been demonstrating good crop yield. Furthermore, it is  
428 interesting to note that the Potassium, Phosphorus and Soil Organic Carbon (SOC) content of this  
429 soil is better than that of other farms. Studies have claimed that regenerative agriculture is the  
430 most promising way to sequester atmospheric carbon and mitigate climate change (51, 52, 53).  
431 India's soil is reported to be highly depleted in SOC levels (54). A time series comparison of  
432 organic agriculture with conventional has shown that organic practice has helped improve SOC  
433 levels in soil from 12.5 g/dm<sup>3</sup> to 21 g/dm<sup>3</sup> and microbial biomass from 87 mg/kg to 120 mg/kg in  
434 a span of just one year (57). An all-round improvement in soil bacterial and nutrient profile  
435 displayed by *Reg-10VP* holds a similar promise for regenerative agriculture in India. The carbon  
436 enriched *Reg-10VP* soil confirms the potential of regenerative agriculture in boosting carbon  
437 sequestration. Going by this argument, Indian agricultural land can form one of the largest  
438 terrestrial carbon sinks to reverse climate change. These findings suggest that regenerative



439 practices stimulate the formation of a healthy microbial community with diverse species to carry  
440 out the biogeochemical processes more efficiently, providing a buffering mechanism that  
441 overcomes the pressures of the ecosystem. These resilient ecosystems can easily tackle the  
442 vulnerabilities due to nutrient inadequacies, pathogen and pest attacks as well as climate change  
443 (14).

444 The intermediate level of bacterial diversity in CV plots is most likely due to the mixed agriculture  
445 methods used by these farmers. Here the farmers integrate both organic manure and chemical  
446 fertilization methods to accrue the benefits from both the systems. If used judiciously, the  
447 synthetic fertilizers may also be useful to supplement the soil with necessary nutrients and in  
448 maintaining the soil's organic matter (SOM) (9, 12, 41). BL soil's poor bacterial richness and high  
449 evenness is attributed to absence of any vegetation for multiple years resulting in continued  
450 exposure to weathering, erosion and deterioration (58). Thus, the BL soil has become depleted  
451 in its microflora and enriched in fewer robust microbes that can sustain in harsh conditions.  
452 Studies conducted on degraded soil in China reveal that poor quality soils display a depleted  
453 Operational Taxonomic Unit (OTU) richness for beneficial microbes and significant enhancement  
454 of pathogenic microbes (59).

455 **Bacterial community structure** - In RV plots we observed an increased representation of  
456 Chloroflexi, Cyanobacteria, Patescibacteria and a slight increment in Actinobacteriota.  
457 Enrichment for Cyanobacteria generally will have a beneficial impact on soil health as these  
458 bacteria improve soil fertility by fixing nitrogen, phosphorus and carbon and by producing plant  
459 growth promoting hormones and siderophores (60). Additionally, exopolysaccharides, which  
460 form 25% of the total biomass of Cyanobacteria are capable of aggregating the soil and organic

461 content and improving the soil's water retention capacity (61, 62). Thus, Cyanobacteria improve  
462 the soil's physical and chemical properties, promoting plant growth and productivity.  
463 Cyanobacterial bio-fertilizer comprising a mixture of free-living Cyanobacteria is highly  
464 recommended for biological nitrogen fixation and phosphorus mobilization in rice and wheat  
465 fields, contributing to significant increase in plant biomass, grain yield and nutritive value (61).  
466 Patescibacteria and Actinobacteriota have been suggested to induce plant root biomass and thus  
467 supporting better nutrient acquisition (63). Role of Chloroflexi in plant health is not clear although  
468 study has reported that Chloroflexi comprising anaerobic bacteria, are found to be enriched in  
469 paddy fields depending on oxygen availability and regulate soil bacterial community composition  
470 (64).

471 Likewise, the RR plots showed an enrichment for Firmicutes and Actinobacteriota population,  
472 which again form a group of extremely beneficial plant growth promoting bacteria (65). Phylum  
473 Firmicutes comprises a number of agro-ecologically beneficial bacterial genera, such as *Bacillus*,  
474 *Paenibacillus*, *Lysinibacillus*, *Brevibacillus*, *Planococcus*, *Clostridium*, *Sporosarcina* etc. (65). Many  
475 of these bacterial genera (eg. *Bacillus*) have been identified as biocontrol and phytoremediation  
476 agents and others as Plant Growth Promoting Rhizobacteria (PGPRs). Thus, enrichment for  
477 Firmicutes in regenerative agriculture plots signifies a marked improvement in soil health.  
478 Members of the phylum Actinobacteriota like *Streptomyces*, *Brevibacteria* and *Nocardia* promote  
479 plant growth as bio-fertilizers and bio-controllers for agricultural sustainability (66). Similarly, a  
480 study has also shown the significance of both Firmicutes and Actinobacteriota in controlling  
481 bacterial disease incidence in tomato plant (67).

482 Barren soil was observed to have a relatively higher representation of Planctomycetota  
483 compared to both conventional and regenerative soils. Additionally, we observed a higher level  
484 of phylum Acidobacteriota representation in barren soil when compared with CR and RR plots.  
485 This is in coherence with a report where an increase in relative abundance of Proteobacteria,  
486 Acidobacteriota and Bacteroidota was observed in degraded soils whereas healthy soils were  
487 enriched for Actinobacteriota and Firmicutes (45).

488 **Plant Growth Promoting Rhizobacteria (PGPRs)** - New developments in the field have shown  
489 that healthy soils are enriched in Plant Growth Promoting Rhizobacteria (PGPRs). These PGPRs  
490 secrete plant growth hormones and regulatory chemicals in the rhizosphere, facilitating plant  
491 growth by enabling plant nutrient procurement, modulating plant hormone levels and by  
492 releasing biocontrol agents to protect plants against pathogens. Many bacterial genera including  
493 *Pseudomonas*, *Bacillus*, *Streptomyces*, *Flavobacterium*, *Achromobacter*, *Mesorhizobium*,  
494 *Paenibacillus*, *Sinorhizobium*, *Burkholderia*, *Rhizobium*, etc. have been classified as PGPRs. Many  
495 of these bacteria are being currently used as biocontrol agents and as bio-fertilizers (38, 68, 69,  
496 70, 71, 72, 73). Augmentation of these bacterial genera in soil directly indicate towards  
497 improvement in soil health.

498 Our study showed a relative enrichment for *Pseudomonas sp.*, in RV plots, *Bacillus sp.*, and  
499 *Mesorhizobium sp.* in RR plots. Many studies have provided evidence that *Pseudomonas* forms  
500 the core of PGPRs for many vegetable, fruit and flowering plants (72, 73). According to studies,  
501 *Pseudomonas* is the most efficient producer of ammonia and enhances bioavailability and bio-  
502 assimilation of nutrients, promoting plant growth and yield (73). Thus, enrichment for  
503 *Pseudomonas sp.* is essentially a favorable development in RV plots. Interestingly, studies show

504 that ragi growth is promoted by the rhizospheric growth of *Bacillus sp.* The *Bacillus sp.* support  
505 ragi growth by fixing nitrogen and protecting the crop against the foot-rot disease causing  
506 pathogen, *Sclerotium rolfsii* (74). Furthermore, *Bacillus sp.* are known to be involved in improving  
507 the nutritive value of the ragi grains by enriching them with essential amino acids (75). An  
508 Ethiopian study suggests that *Bacillus* and *Pseudomonas* species form significant PGPRs  
509 supporting vegetable crops (72). In effect an enrichment for *Pseudomonas sp.* in RV plots and for  
510 *Bacillus sp.* in ragi plots signify a beneficial transformation in soil bacterial composition. Likewise,  
511 *Mesorhizobium sp.* are found to be very useful PGPRs with their special property of synthesizing  
512 ACC deaminase enzyme which protects plant against abiotic stress by degrading ACC which forms  
513 the precursor for ethylene. Additionally, *Mesorhizobium sp.* synthesizes IAA which promotes  
514 plant root growth and also is involved in inorganic phosphate solubilization making it available to  
515 plants (76). Thus enrichment for *Mesorhizobium sp.* has multifarious benefits. Magadi soil seems  
516 to be inherently enriched in *Streptomyces sp.* *Streptomyces sp.* also form an important group of  
517 agriculturally beneficial rhizosphere bacteria (77, 78). *Streptomyces* synthesize plant hormone –  
518 Indole acetic acid (IAA) in moderate quantities and help in phosphate solubilization and stress  
519 tolerance thus boosting plant growth and productivity. Thus this clearly indicates that  
520 regenerative agriculture practices are able to induce a healthy microbial population in the soil for  
521 promoting soil's overall health and agricultural.

522 **Regenerative practices and their impact** - Almost all regenerative agricultural plots considered  
523 here have indicated to the use of farmyard manure as an important supplement for soil  
524 management. Manure addition has been ascribed to inducing increased microbial biomass in soil  
525 (79, 80). Some studies indicate that the type and source of farm manure dictates the soil

526 microbial population (59, 60). However, it may be difficult to define the source of origin of a  
527 microbe in soil. For instance, one report claims that cow manure enriches the soil for Firmicutes  
528 and Bacteroidota while another suggests an enrichment for Firmicutes and Proteobacteria.  
529 Contrary to this, a recent study claims that in a span of two weeks from manure addition, the  
530 microbes coming from the manure are mostly lost while the soil-borne microbes are activated to  
531 grow and multiply (81). Regenerative plots demonstrated an increased growth of Firmicutes  
532 particularly *Bacillus sp.* in ragi fields and Proteobacteria (*Pseudomonas sp.*) in vegetable plots. In  
533 addition, since almost all the regenerative farms are using multiple regenerative practices apart  
534 from just farmyard manure application, these additional treatments will also influence the soil  
535 microbiome. More studies are therefore required to ascertain the roles of these individual  
536 treatments in determining the microbial community structure. In *Reg-10VP* plot a rich  
537 supplementation of farmyard manure (400 kg/ row) could have been a significant contributing  
538 factor to the plot's best nutrient and bacterial profile. However, since not all farms will be able  
539 to afford this kind of soil supplementation regimes, policies and practices such as encouragement  
540 of circular economy to provide household based compost to farmers is necessary.

541 **Influence of region and crop on soil bacterial composition-** Soil microbial community structure  
542 was found to be influenced by regional and spatial characteristics. Certain regions required  
543 greater inputs with many years of application and others much less to achieve a credible  
544 improvement in microbial health and soil quality. This is evident from the Magadi obtained soil  
545 samples – *Reg-1VA*, *Reg-3VP* and *Reg-1RA*. These regenerative agriculture plots have been  
546 practicing for just one, three and one year respectively, yet these soils showed very high alpha  
547 diversity (*Figure 2a, 2b*) and a distinctly heterogeneous and highly diverse bacterial composition

548 with a higher representation of *Streptomyces* sp. (Figure 4a, 4b). Additionally, crop-plants also  
549 play a role in defining the soil's bacterial community structure as is evident from the varied  
550 profiles exhibited by regenerative plots growing ragi and vegetable crops (82, 83, 84).

551 **Soil Microbiome Impacts of merging conventional and regenerative systems** - The *Con-VP2*  
552 where soil sampling was done in presence of crop forms a suitable example of a plot where the  
553 two agricultural systems – Conventional and Regenerative have been integrated for land and  
554 crop management. This plot shows a distinctly high alpha diversity comparable to that in *Reg-*  
555 *12VA* plot, where soil was collected in absence of crop. However, the alpha diversity of *Con-VP2*  
556 is still found to be lesser than all the RV plots where soil was taken in the presence of the crop.  
557 Thus we conclude that addition of any amount of synthetic fertilizer will have an adverse impact  
558 on the soil microbiome. Application of inorganic fertilizers comes with a host of adverse effects  
559 in soil including increase in salinity, acidification, soil compacting and poor water retention,  
560 impact on biogeochemical processes by altering microbial dynamics, accumulation of toxic  
561 wastes/heavy metals and finally reduced microbial diversity (85). Ragi conventional plots  
562 obtained in our study are a clear indication of the detrimental effect of conventional agriculture.  
563 In this study, merging of the two systems of agriculture shows an intermediate profile in terms  
564 of bacterial diversity, however based on available literature it would be safer to adopt  
565 regenerative agriculture independently for sustainability.

566

567 **Conclusion**

568 This study aimed to compare and elucidate the effectiveness of regenerative agriculture practice  
569 on soil microbial and nutritive health with respect to conventional agriculture and barren soil.  
570 Barring a few exceptions owed to different original baselines of the selected plots, the  
571 observations show that extended periods of regenerative practice does improve soil bacterial  
572 diversity and soil nutrient health. Even SOC levels were found to be within the desired range in  
573 long-term regenerative application plots. Regenerative plots showed an enrichment for bacterial  
574 phyla which promote soil health and plant growth sustainably. Despite variabilities in  
575 regenerative practices adopted by the farmers we could still see a better bacterial community  
576 structure and richness in all regenerative plots. The results reinforce the importance of  
577 regenerative agriculture for sustainable management of soil health and agriculture. Thus we  
578 conclude that at least five years and more of regenerative agriculture practice can help to boost  
579 soil microbial health potentiating an enrichment for major and micronutrients, subsequently  
580 enhancing plant growth and productivity. Furthermore, we conclude that mixing of the  
581 conventional and regenerative practices is not a sustainable option for maintaining good  
582 biological health of the soil.

583 The RA plot showing the best bacterial profile and ideal SOC levels uses very heavy application of  
584 farmyard manure for soil management and Jeevamrutha for pest management. Thus although  
585 regenerative agriculture has the ability to induce beneficial outcomes in soil health and  
586 agriculture, the required impact is made possible only with a heavy use of amendments at least  
587 in the initial decade or so. This identifies the need for instituting a continued and surplus supply  
588 of manure to the farmers for ensuring high grade outputs.

589

## 590 Acknowledgements

591 This research is part of the SHEFS - an interdisciplinary research partnership, forming part of the Wellcome  
592 Trust's funded Our Planet, Our Health programme, with the overall objective to provide novel evidence  
593 to define future food systems policies to deliver nutritious and healthy foods in an environmentally  
594 sustainable and socially equitable manner. This research was funded by the Wellcome Trust through the  
595 Sustainable and Healthy Food Systems (SHEFS) Project (Grant number- 205200/Z/16/Z).

596

597

## 598 References

599

- 600 1. Madhusudhan L. (2015). Agriculture Role on Indian Economy. *Bus. Eco. J.*, 6:4 DOI:  
601 10.4172/2151-6219.1000176
- 602 2. Daisy A. John and Giridhar Babu. (2021). Lessons from the Aftermaths of Green Revolution  
603 on Food System and Health. *Front. Sustain. Food Syst.*,  
604 <https://doi.org/10.3389/fsufs.2021.644559>
- 605 3. T. S. Sathyanarayana Rao, Mahesh R. Gowda, Kanchana Ramachandran, and Chittaranjan  
606 Andrade. (2017). Prevention of farmer suicides: Greater need for state role than for a mental  
607 health professional's role. *Indian J Psychiatry*. 59(1): 3–5.
- 608 4. Manikant Tripathi, Rajeeva Gaur. (2021). Bioactivity of soil microorganisms for agriculture  
609 development, Eds: Jay Shankar Singh, Shashank Tiwari, Chhatarpal Singh, Anil Kumar  
610 Singh, *Microbes in Land Use Change Management*, Elsevier, Pp: 197-220,  
611 <https://doi.org/10.1016/B978-0-12-824448-7.00012-7>.
- 612 5. Kishan Mahmud, Ali Missaoui, Kendall Lee, Bhawana Ghimire, Holly W. Presley, Shiva  
613 Makaju. (2021). Rhizosphere microbiome manipulation for sustainable crop production,  
614 *Current Plant Biology*, Vol. 27, 100210, <https://doi.org/10.1016/j.cpb.2021.100210>.
- 615 6. Ranjit Kumar, Sanjiv Kumar, BS Yashavanth, PC Meena, AK Indoria, Sumanta Kundu, M  
616 Manjunath (2020) Adoption of Natural Farming and its Effect on Crop Yield and Farmers'  
617 Livelihood in India. ICAR-National Academy of Agricultural Research Management,  
618 Hyderabad, India.
- 619 7. L. Schreefel, R.P.O. Schulte, I.J.M. de Boer, A. Pas Schrijver, H.H.E. van Zanten. (2020).  
620 Regenerative agriculture – the soil is the base. *Global Food Security*, Vol. 26, 100404, ISSN  
621 2211-9124, <https://doi.org/10.1016/j.gfs.2020.100404>.
- 622 8. Brodt, S., Six, J., Feenstra, G., Ingels, C. & Campbell, D. (2011). Sustainable  
623 Agriculture. *Nature Education Knowledge* 3(10):1



- 624 9. Giller KE, Hijbeek R, Andersson JA, Sumberg J. (2021). Regenerative Agriculture: An  
625 agronomic perspective. *Outlook on Agriculture*. 50(1):13-25.  
626 doi:[10.1177/0030727021998063](https://doi.org/10.1177/0030727021998063)
- 627 10. Newton Peter, Civita Nicole, Frankel-Goldwater Lee, Bartel Katharine, Johns Colleen.  
628 (2020). What Is Regenerative Agriculture? A Review of Scholar and Practitioner Definitions  
629 Based on Processes and Outcomes. *Frontiers in Sustainable Food Systems*, Vol. 4  
630 <https://www.frontiersin.org/article/10.3389/fsufs.2020.577723>
- 631 11. Aryal, J.P., Sapkota, T.B., Krupnik, T.J. *et al.* Factors affecting farmers' use of organic and  
632 inorganic fertilizers in South Asia. *Environ. Sci. Pollut. Res* 28, 51480–51496 (2021).  
633 <https://doi.org/10.1007/s11356-021-13975-7>
- 634 12. Deepak Pental. (2021). Challenges for India in agriculture and the pivotal role of R&D in  
635 meeting these. *Dialogue: Science, Scientists and Society*. Indian Academy of Science.  
636 DOI: [10.29195/DSSS.03.01.0032](https://doi.org/10.29195/DSSS.03.01.0032)
- 637 13. Lijbert Brussaard, Peter C. de Ruiter, George G. Brown. (2007). Soil biodiversity for  
638 agricultural sustainability. *Agriculture, Ecosystems & Environment*. Vol. 121, Issue 3, Pages  
639 233-244.
- 640 14. Aytenuw, Mulugeta. (2021). "Soil Biodiversity as a Key Sponsor of Regenerative  
641 Agriculture" In *Biodiversity of Ecosystems*, edited by Levente Hufnagel. London:  
642 IntechOpen, [10.5772/intechopen.99716](https://doi.org/10.5772/intechopen.99716)
- 643 15. Bertola, Marta, Andrea Ferrarini, and Giovanna Visioli. 2021. "Improvement of Soil  
644 Microbial Diversity through Sustainable Agricultural Practices and Its Evaluation by -Omics  
645 Approaches: A Perspective for the Environment, Food Quality and Human  
646 Safety" *Microorganisms* 9, no. 7: 1400. <https://doi.org/10.3390/microorganisms9071400>
- 647 16. Fierer, Noah & Wood, Stephen & Bueno de Mesquita, Clifton P. (2020). How microbes can,  
648 and cannot, be used to assess soil health. *Soil Biology and Biochemistry*. 153. 108111.  
649 [10.1016/j.soilbio.2020.108111](https://doi.org/10.1016/j.soilbio.2020.108111).
- 650 17. Ahemad, Munees & Kibret, Mulugeta. (2013). Mechanisms and applications of plant growth  
651 promoting rhizobacteria: Current perspective. *Journal of King Saud University - Science*.  
652 26. [10.1016/j.jksus.2013.05.001](https://doi.org/10.1016/j.jksus.2013.05.001).
- 653 18. Karthikeyan Smruthi, Orellana Luis H., Johnston Eric R., Hatt Janet K., Löffler Frank E.,  
654 Ayala-del-Río Héctor L., González Grizelle, Konstantinidis Konstantinos T. and Drake Harold  
655 L. (2022). Metagenomic Characterization of Soil Microbial Communities in the Luquillo  
656 Experimental Forest (Puerto Rico) and Implications for Nitrogen Cycling. *Applied and  
657 Environmental Microbiology*. 87(12). <https://doi.org/10.1128/AEM.00546-21>.
- 658 19. Pang Ziqin, Dong Fei, Liu Qiang, Lin Wenxiong, Hu Chaohua and Yuan Zhaonian. (2021).  
659 Soil Metagenomics Reveals Effects of Continuous Sugarcane Cropping on the Structure and  
660 Functional Pathway of Rhizospheric Microbial Community. *Frontiers in Microbiology*. Vol.  
661 12. <https://www.frontiersin.org/article/10.3389/fmicb.2021.627569>
- 662 20. Feng, G., Xie, T., Wang, X. *et al.* Metagenomic analysis of microbial community and  
663 function involved in cd-contaminated soil. *BMC Microbiol* 18, 11 (2018).  
664 <https://doi.org/10.1186/s12866-018-1152-5>
- 665 21. Ding, J., Zhang, Y., Deng, Y. *et al.* Integrated metagenomics and network analysis of soil  
666 microbial community of the forest timberline. *Sci Rep* 5, 7994 (2015).  
667 <https://doi.org/10.1038/srep07994>

- 668 22. Kondvilkar, Nilam & Thakare, Ritu & Annapurna, Mvvi. (2017). Level of significance of  
669 various chemical properties of soils in Sakri Tehsil of Dhule District (M.S.). 1960-1967.
- 670 23. Walkley, A.J. and Black, I.A. (1934) Estimation of soil organic carbon by the chromic acid  
671 titration method. *Soil Sci.* 37, 29-38.
- 672 24. Subbiah, B.V. and Asija, G.L. (1956) A Rapid Procedure for the Estimation of Available  
673 Nitrogen in Soils. *Current Science*, 25, 259-260.
- 674 25. Olsen SR, Cole C, Watanabe CV, Dean LA (1954) Estimation of available phosphorus in soils  
675 by extraction with sodium bicarbonate. USDA Circular No. 939
- 676 26. Lindsay, W.L. and Norwell, W.A. (1978) Development of DTPA of Soil Test for Zn, Fe, Mn  
677 and Cu. *Journal of American Soil Science*, 42, 421-428.  
678 <http://dx.doi.org/10.2136/sssaj1978.03615995004200030009x>
- 679 27. Andrews, S. (2010). FastQC: a quality control tool for high throughput sequence data.  
680 <https://www.bioinformatics.babraham.ac.uk/projects/fastqc/>
- 681 28. Andrews S, Krueger F, Segonds-Pichon A, Biggins L, Virk B, Dalle-Pezze P, Wingett S, Saadeh  
682 H, Ahlfors H (2015) Trim  
683 Galore. [https://www.bioinformatics.babraham.ac.uk/projects/trim\\_galore/](https://www.bioinformatics.babraham.ac.uk/projects/trim_galore/)
- 684 29. Bolyen E, et al. (2019). Reproducible, interactive, scalable and extensible microbiome data  
685 science using QIIME 2. *Nature Biotechnology* 37: 852–857.  
686 <https://doi.org/10.1038/s41587-019-0209-9>
- 687 30. Wickham H (2016). ggplot2: Elegant Graphics for Data Analysis. Springer-Verlag New York.  
688 ISBN 978-3-319-24277-4, <https://ggplot2.tidyverse.org>.
- 689 31. Rattan, R.K. and Goswami, N.N. (2012). Essential nutrient and their uptake by plants. In:  
690 Fundamentals of soil science. Ed: Goswami NN, et al. Indian Society of Social Science, New  
691 Delhi.
- 692 32. USDA. (1998). Soil Quality Indicators: pH. USDA Natural Resources Conservation Service  
693 [https://www.nrcs.usda.gov/Internet/FSE\\_DOCUMENTS/nrcs142p2\\_052208.pdf](https://www.nrcs.usda.gov/Internet/FSE_DOCUMENTS/nrcs142p2_052208.pdf)
- 694 33. Benfey, P.N., Bennett, M., Scheifelbein, J. Getting to the root of plant biology: impact of  
695 the Arabidopsis genome sequence on root research. *The plant journal*. 61:992-1000.  
696 (2010).
- 697 34. Berg, G. Smalla, K. Plant species and soil type cooperatively shape the structure and  
698 function of microbial communities in the rhizosphere. *FEMS Microbiol. Ecol.* 68:1-13  
699 (2009)
- 700 35. Beneduzi, A., Ambrosini, A., & Passaglia, L. M. (2012). Plant growth-promoting  
701 rhizobacteria (PGPR): Their potential as antagonists and biocontrol agents. *Genetics and*  
702 *molecular biology*, 35(4 (suppl)), 1044–1051. [https://doi.org/10.1590/s1415-](https://doi.org/10.1590/s1415-47572012000600020)  
703 [47572012000600020](https://doi.org/10.1590/s1415-47572012000600020)
- 704 36. Backer Rachel, Rokem J. Stefan, Ilangumaran Gayathri, Lamont John, Praslickova Dana,  
705 Ricci Emily, Subramanian Sowmyalakshmi, Smith Donald L. (2018). Plant Growth-  
706 Promoting Rhizobacteria: Context, Mechanisms of Action, and Roadmap to  
707 Commercialization of Biostimulants for Sustainable Agriculture. *Frontiers in Plant Science*.  
708 Vol. 9.
- 709 37. de Souza, R., Meyer, J., Schoenfeld, R. et al. (2015). Characterization of plant growth-  
710 promoting bacteria associated with rice cropped in iron-stressed soils. *Ann*  
711 *Microbiol* 65, 951–964. <https://doi.org/10.1007/s13213-014-0939-3>

- 712 38. Dweipayan Goswami, Janki N., Thakker & Pinakin C. Dhandhukia, Manuel Tejada Moral  
713 (2016). Portraying mechanics of plant growth promoting rhizobacteria (PGPR): A  
714 review, *Cogent Food & Agriculture*, 2:1, DOI: [10.1080/23311932.2015.1127500](https://doi.org/10.1080/23311932.2015.1127500)  
715 39. Giller KE, Hijbeek R, Andersson JA, Sumberg J. (2021). Regenerative Agriculture: An  
716 agronomic perspective. *Outlook on Agriculture*. 50(1):13-25.  
717 doi:[10.1177/0030727021998063](https://doi.org/10.1177/0030727021998063)  
718 40. Rajendra Hegde, K.S. AnilKumar, S.C. Ramesh Kumar, M. Devaraju & Rudragouda. (2007).  
719 Characteristics and Classification of Soils of Amani Shivpurkere Watershed (Linganahalli  
720 Village) Doddaballapur Taluk, Bangalore Rural District. *Karnataka J. Agric. Sci.*, 21(3): (373-  
721 378).  
722 41. Bijay Singh. (2018). "Are Nitrogen Fertilizers Deleterious to Soil Health?" *Agronomy* 8, no.  
723 4: 48. <https://doi.org/10.3390/agronomy8040048>  
724 42. Kishan Mahmud, Dinesh Panday, Anaas Mergoum and Ali Missaoui. (2021). Nitrogen  
725 Losses and Potential Mitigation Strategies for a Sustainable Agroecosystem. *Sustainability*,  
726 13, 2400. <https://doi.org/10.3390/su13042400>  
727 43. Mir Zaman Hussain, G. Philip Robertson, Bruno Basso, Stephen K. Hamilton. (2020).  
728 Leaching losses of dissolved organic carbon and nitrogen from agricultural soils in the  
729 upper US Midwest, *Science of The Total Environment*, Vol. 734, 139379,  
730 <https://doi.org/10.1016/j.scitotenv.2020.139379>.  
731 44. Heena Nisar Pahalvi, Lone Rafiya, Sumaira Rashid, Bisma Nisar and Azra N. Kamili. (2021).  
732 Chemical Fertilizers and Their Impact on Soil Health. In G. H. Dar et al. (Eds.) *Microbiota*  
733 *and Biofertilizers, Vol 2*, Chapter 1, 1-20. Springer Nature 1 Switzerland AG.  
734 [https://doi.org/10.1007/978-3-030-61010-4\\_1](https://doi.org/10.1007/978-3-030-61010-4_1)  
735 45. Zhang, H., Wang, R., Chen, S. *et al.* (2017). Microbial taxa and functional genes shift in  
736 degraded soil with bacterial wilt. *Sci Rep* 7, 39911. <https://doi.org/10.1038/srep39911>  
737 46. Alsharif Wiam, Saad Maged M., Hirt Heribert. (2020). Desert Microbes for Boosting  
738 Sustainable Agriculture in Extreme Environments. *Frontiers in Microbiology*. Vol. 11.  
739 <https://www.frontiersin.org/article/10.3389/fmicb.2020.01666>  
740 47. Sookjin Kim, Sandipan Samaddar, Poulami Chatterjee, Aritra Roy Choudhury, Jeongyun  
741 Choi, Jongseo Choi and Tongmin Sa. (2021). Structural and Functional Shift in Soil Bacterial  
742 Community in Response to Long-Term Compost Amendment in Paddy Field. *Appl. Sci.* 11,  
743 2183. <https://doi.org/10.3390/app11052183>  
744 48. Ha, J., Gao, Y., Zhang, R., Li, K., Zhang, Y., Niu, X., Chen, X., Luo, K., & Chen, Y. (2021).  
745 Diversity of the Bacterial Microbiome Associated With the Endosphere and Rhizosphere of  
746 Different Cassava (*Manihot esculenta* Crantz) Genotypes. *Frontiers in microbiology*, 12,  
747 729022. <https://doi.org/10.3389/fmicb.2021.729022>  
748 49. Guolin Zhang, Xingbiao Chu, Hanyang Zhu, Dongsheng Zou, Longcheng Li, and Linsen Du.  
749 (2021). The Response of Soil Nutrients and Microbial Community Structures in Long-Term  
750 Tea Plantations and Diverse Agroforestry Intercropping Systems. *Sustainability*. 13, 7799.  
751 <https://doi.org/10.3390/su13147799>  
752 50. Qing Zheng, Yuntao Hu, Shasha Zhang, Lisa Noll, Theresa Böckle, Marlies Dietrich, Craig W.  
753 Herbold, Stephanie A. Eichorst, Dagmar Woebken, Andreas Richter, Wolfgang Wanek.  
754 (2019). Soil multifunctionality is affected by the soil environment and by microbial

- 755 community composition and diversity. *Soil Biology and Biochemistry*, Vol. 136, 107521.  
756 <https://doi.org/10.1016/j.soilbio.2019.107521>.
- 757 51. Tuomas J. Mattila, Eija Hagelberg, Sanna Söderlund, Juuso Joonas. (2022). How farmers  
758 approach soil carbon sequestration? Lessons learned from 105 carbon-farming plans. *Soil*  
759 *and Tillage Research*. Vol. 215, 105204. <https://doi.org/10.1016/j.still.2021.105204>.
- 760 52. Paustian Keith, Larson Eric, Kent Jeffrey, Marx Ernie, Swan Amy. (2019). Soil C  
761 Sequestration as a Biological Negative Emission Strategy. *Frontiers in Climate*. Vol. 1  
762 <https://www.frontiersin.org/article/10.3389/fclim.2019.00008>
- 763 53. Kell D. B. (2012). Large-scale sequestration of atmospheric carbon via plant roots in natural  
764 and agricultural ecosystems: why and how. *Philosophical transactions of the Royal Society*  
765 *of London. Series B, Biological sciences*, 367(1595), 1589–1597.  
766 <https://doi.org/10.1098/rstb.2011.0244>
- 767 54. T. Bhattacharyya, S.K. Ray, D.K. Pal, P. Chandran, C. Mandal and S.P. Wani. (2009). Soil  
768 Carbon Stocks in India — Issues and Priorities. *Journal of the Indian Society of Soil Science*,  
769 Vol. 57, No. 4, 461-468.
- 770 55. Paula Harkes, Afnan K. A. Suleiman, Sven J. J. van den Elsen, Johannes J. de Haan, Martijn  
771 Holterman, Eiko E. Kuramae and Johannes Helder. (2019) Conventional and organic soil  
772 management as divergent drivers of resident and active fractions of major soil food web  
773 constituents. *Scientific Reports*. 9:13521 <https://doi.org/10.1038/s41598-019-49854-y>
- 774 56. Krista Peltoniemi, Sannakajsa Velmala, Hannu Fritze, Riitta Lemola, Taina Pennanen.  
775 (2021). Long-term impacts of organic and conventional farming on the soil microbiome in  
776 boreal arable soil *European Journal of Soil Biology* 104: 103314.  
777 <https://doi.org/10.1016/j.ejsobi.2021.103314>
- 778 57. Ademir S.F. Araújo, Luiz F.C. Leite, Valdinar B. Santos and Romero F.V. Carneiro. (2009) Soil  
779 Microbial Activity in Conventional and Organic Agricultural Systems. *Sustainability*. 1, 268-  
780 276; doi:10.3390/su1020268
- 781 58. Qiu, L., Zhang, Q., Zhu, H. *et al.* (2021). Erosion reduces soil microbial diversity, network  
782 complexity and multi-functionality. *ISME J.* 15, 2474–2489.  
783 <https://doi.org/10.1038/s41396-021-00913-1>
- 784 59. Zhang, H., Wang, R., Chen, S. *et al.* (2017). Microbial taxa and functional genes shift in  
785 degraded soil with bacterial wilt. *Sci Rep* 7, 39911 (2017).  
786 <https://doi.org/10.1038/srep39911>
- 787 60. Jainendra Pathak, Rajneesh, Pankaj K. Maurya, Shailendra P. Singh, Donat-P. Häder and  
788 Rajeshwar P. Sinha. (2018). Cyanobacterial Farming for Environment Friendly Sustainable  
789 Agriculture Practices: Innovations and Perspectives. *Frontiers in Environmental Science*  
790 Vol. 6: 7
- 791 61. Deepali Chittora, Mukesh Meena, Tansukh Barupal, Prashant Swapnil, Kanika Sharma.  
792 (2020). Cyanobacteria as a source of biofertilizers for sustainable agriculture. *Biochemistry*  
793 *and Biophysics Reports*. Vol. 22: 100737
- 794 62. Jay Shankar Singh, Arun Kumar, Amar N. Rai and Devendra P. Singh. (2016). Cyanobacteria:  
795 A Precious Bio-resource in Agriculture, Ecosystem, and Environmental Sustainability.  
796 *Frontiers in Microbiology*. Vol. 7: 529

- 797 63. Hannula, S.E., Heinen, R., Huberty, M. *et al.* (2021). Persistence of plant-mediated  
798 microbial soil legacy effects in soil and inside roots. *Nat Commun* 12, 5686.  
799 <https://doi.org/10.1038/s41467-021-25971-z>
- 800 64. Tang, Z., Zhang, L., He, N. *et al.* (2021). Soil bacterial community as impacted by addition  
801 of rice straw and biochar. *Sci Rep* 11, 22185 <https://doi.org/10.1038/s41598-021-99001-9>
- 802 65. Isha Hashmi, Saskia Bindschedler, Pilar Junier. (2020). Firmicutes. 363-395, In - Beneficial  
803 Microbes in Agro-Ecology. Eds. N. Amaresan, M Senthil Kumar, K. Annapurna, Krishna  
804 Kumar and A Sankaranarayanan. Publishers - Elsevier Inc.
- 805 66. Neelam Yadav and Ajar Nath Yadav. (2019). Actinobacteria for sustainable agriculture. *J*  
806 *Appl Biotechnol & Bioeng.* 6(1):38–41.
- 807 67. Lee, S. M., Kong, H. G., Song, G. C., & Ryu, C. M. (2021). Disruption of Firmicutes and  
808 Actinobacteria abundance in tomato rhizosphere causes the incidence of bacterial wilt  
809 disease. *The ISME journal*, 15(1), 330–347. <https://doi.org/10.1038/s41396-020-00785-x>
- 810 68. Jiao Xiurong, Takishita Yoko, Zhou Guisheng, Smith Donald L. (2021). Plant Associated  
811 Rhizobacteria for Biocontrol and Plant Growth Enhancement. *Frontiers in Plant Science*.  
812 Vol. 12. <https://www.frontiersin.org/article/10.3389/fpls.2021.634796>
- 813 69. Riaz, Umair & Murtaza, Dr. Ghulam & Anum, Wajiha & Samreen, Tayyaba & Sarfraz,  
814 Muhammad & Nazir, Muhammad. (2020). Plant Growth-Promoting Rhizobacteria (PGPR)  
815 as Biofertilizers and Biopesticides. 10.1007/978-3-030-48771-3\_11.
- 816 70. Pirttilä AM, Mohammad Parast Tabas H, Baruah N, Koskimäki JJ. Biofertilizers and  
817 Biocontrol Agents for Agriculture: How to Identify and Develop New Potent Microbial  
818 Strains and Traits. *Microorganisms*. 2021 Apr 13;9(4):817. doi:  
819 10.3390/microorganisms9040817. PMID: 33924411; PMCID: PMC8069042.
- 820 71. El-Sersawy, Mostafa Mohamed, Hassan, Saad El-Din, El-Ghamry, Abbas A., El-Gwad, Amr  
821 Mahmoud Abd and Fouda, Amr. (2021). "Implication of plant growth-promoting  
822 rhizobacteria of *Bacillus* spp. as biocontrol agents against wilt disease caused by *Fusarium*  
823 *oxysporum* Schlecht. in *Vicia faba* L." *Biomolecular Concepts*, vol. 12, no. 1, 197-214.  
824 <https://doi.org/10.1515/bmc-2021-0020>
- 825 72. Habtamu Mekonnen and Mulugeta Kibret. (2021). The roles of plant growth promoting  
826 rhizobacteria in sustainable vegetable production in Ethiopia. *Chem. Biol. Technol. Agric.*  
827 8:15.
- 828 73. R. Qessaoui, R. Bouharroud, J. N. Furze, M. El Aalaoui, H. Akroud, A. Amarraque, J. Van  
829 Vaerenbergh, R. Tahzima, E. H. Mayad & B. Chebli. (2018). Applications of New  
830 Rhizobacteria *Pseudomonas* Isolates in Agro-ecology via Fundamental Processes  
831 Complementing Plant Growth. *Sci. Rep.* 9:12832 [https://doi.org/10.1038/s41598-019-](https://doi.org/10.1038/s41598-019-49216-860)  
832 [49216-860](https://doi.org/10.1038/s41598-019-49216-860).
- 833 74. Choudhary R., Rawat G., Kumar V., Kumar V. (2020) Diversity and Function of Microbes  
834 Associated with Rhizosphere of Finger Millet (*Eleusine coracana*). In: Sharma S.K., Singh  
835 U.B., Sahu P.K., Singh H.V., Sharma P.K. (eds) Rhizosphere Microbes. *Microorganisms*  
836 for Sustainability. Vol. 23. Springer, Singapore. [https://doi.org/10.1007/978-981-15-](https://doi.org/10.1007/978-981-15-9154-9_17)  
837 [9154-9\\_17](https://doi.org/10.1007/978-981-15-9154-9_17)



- 838 75. Shrivardhan Dheeman, Nitin Baliyan, Ramesh Chandra Dubey, Dinesh Kumar  
839 Maheshwari, Sandeep Kumar, and Lei Chen. (2020). Combined effects of rhizo-  
840 competitive rhizosphere and non-rhizosphere *Bacillus* in plant growth promotion and  
841 yield improvement of *Eleusine coracana* (Ragi). *Can J Microbiol.* 66(2):111-124. doi:  
842 10.1139/cjm-2019-0103.
- 843 76. Muleta, A., Tesfaye, K., Haile Selassie, T.H. *et al.* (2021). Phosphate solubilization and  
844 multiple plant growth promoting properties of *Mesorhizobium* species nodulating  
845 chickpea from acidic soils of Ethiopia. *Arch Microbiol* 203, 2129–2137.  
846 <https://doi.org/10.1007/s00203-021-02189-7>
- 847 77. V. Srinivas, S Gopalakrishnana, J. Prasad Kamidi and G. Chander. (2020). Effect of plant  
848 growth-promoting *Streptomyces* sp. on plant growth and yield of tomato and chilli. *Andhra*  
849 *Pradesh J Agril. Sci.:* 6(2): 65-70.
- 850 78. Windy Manullang, Huey-wen Chuang. (2020). *Streptomyces* sp. mitigates abiotic stress  
851 response and promotes plant growth. Vol. 60, No. 3: 263–274, 2020. DOI:  
852 10.24425/jppr.2020.133955
- 853 79. Aziz Faissal, N. Ouazzani, J.R. Parrado, M. Dary, H. Manyani, B.R. Morgado, M.D. Barragan,  
854 and L. Mandi. (2017). Impact of fertilization by natural manure on the microbial quality of  
855 soil: Molecular approach. *Saudi Journal of Biological Sciences* Vol. 24: 6, 1437-1443.
- 856 80. Suwendu Das, Seung Tak Jeong, Subhasis Das and Pil Joo Kim. (2017) Composted Cattle  
857 Manure Increases Microbial Activity and Soil Fertility More Than Composted Swine  
858 Manure in a Submerged Rice Paddy. *Frontiers in Microbiology.* Vol. 8:  
859 1702. <https://doi.org/10.3389/fmicb.2017.01702>
- 860 81. Mikhail V. Semenov, George S. Krasnov, Vyacheslav M. Semenov, Natalia Ksenofontova,  
861 Natalia B. Zinyakova, Ariena H.C. van Bruggen. (2021). Does fresh farmyard manure  
862 introduce surviving microbes into soil or activate soil-borne microbiota? *Journal of*  
863 *Environmental Management* Vol. 294: 113018  
864 <https://doi.org/10.1016/j.jenvman.2021.113018>
- 865 82. Hartman, K., & Tringe, S. G. (2019). Interactions between plants and soil shaping the root  
866 microbiome under abiotic stress. *The Biochemical journal*, 476(19), 2705–2724.  
867 <https://doi.org/10.1042/BCJ20180615>
- 868 83. Jacoby, Richard & Peukert, Manuela & Succurro, Antonella & Koprivova, Anna & Kopriva,  
869 Stanislav. (2017). The Role of Soil Microorganisms in Plant Mineral Nutrition—Current  
870 Knowledge and Future Directions. *Frontiers in Plant Science.* 8. 1617.  
871 10.3389/fpls.2017.01617.
- 872 84. Song Xiuli, Tao Bo, Guo Jing, Li Jingjing, Chen Guofeng. (2018). Changes in the Microbial  
873 Community Structure and Soil Chemical Properties of Vertisols Under Different Cropping  
874 Systems in Northern China. *Frontiers in Environmental Science*, Vol. 6, DOI-  
875 10.3389/fenvs.2018.00132
- 876 85. Pratibha Prashar and Shachi Shah (2016). Impact of Fertilizers and Pesticides on Soil  
877 Microflora in Agriculture. E. Lichtfouse (ed.), *Sustainable Agriculture Reviews*, Sustainable

878 Agriculture Reviews 19, Springer International Publishing Switzerland. DOI 10.1007/978-  
879 3-319-26777-7\_8

880

881

882

883 **Figures**

884

885 **Figure 1**

886

887

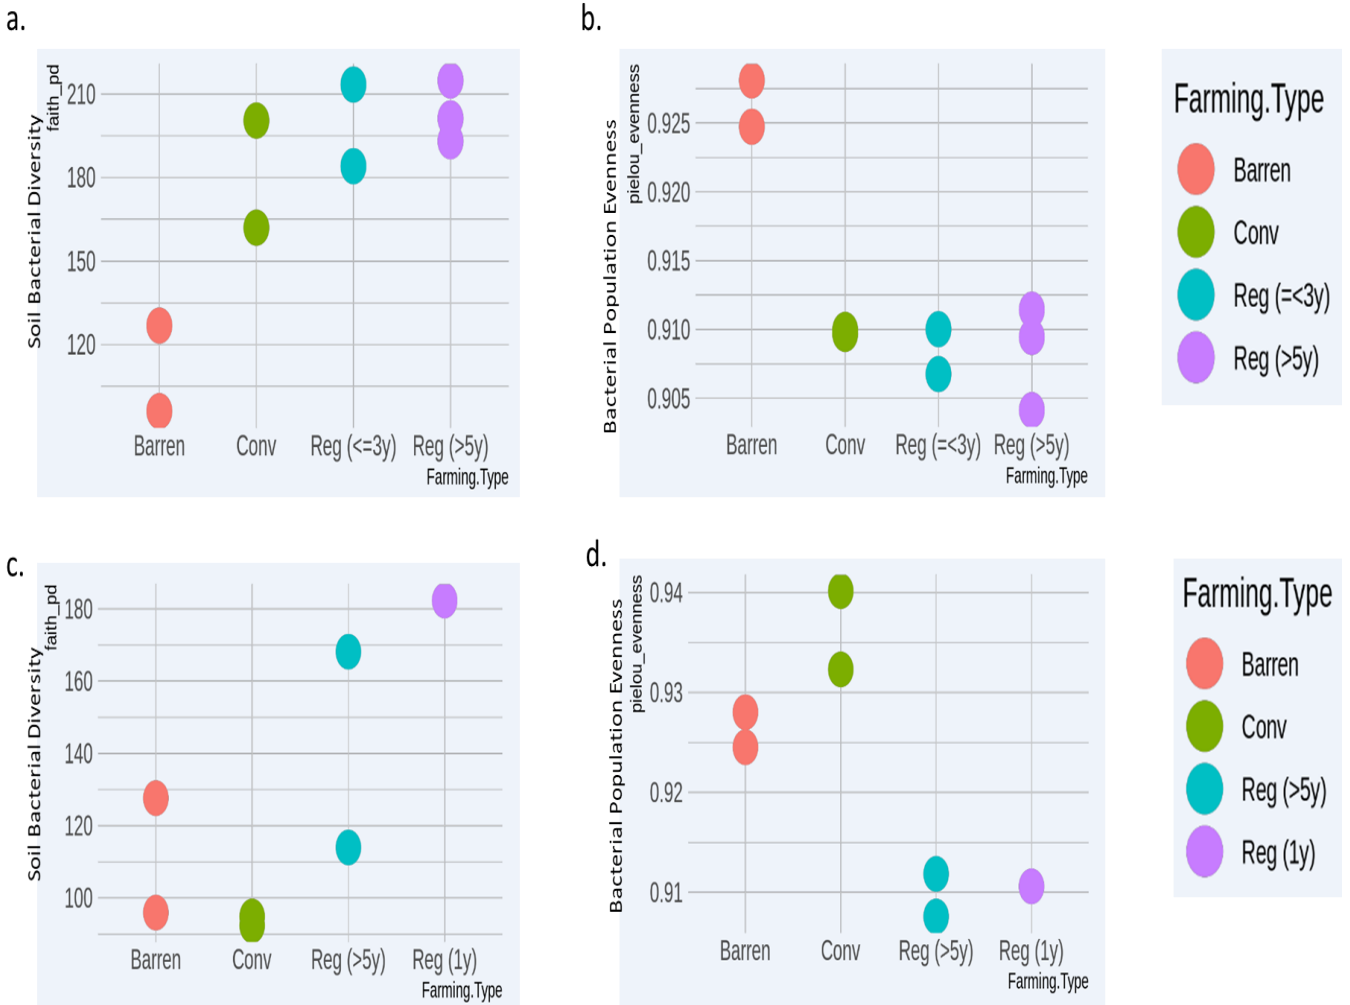

888

889

890 **Figure 1.** Comparative bacterial Richness **(a)** and Evenness **(b)** analysis of Vegetable growing

891 conventional (*Conv*) and Regenerative agriculture (*Reg*) plots with Barren land (BL) soil.

892 Comparative bacterial Richness **(c)** and Evenness **(d)** analysis of Ragi growing conventional (*Conv*)

893 and Regenerative agriculture (*Reg*) plots with Barren land (BL) soil.



894 **Figure 2**

895

896

897

898

899

900

901

902

903

904

905

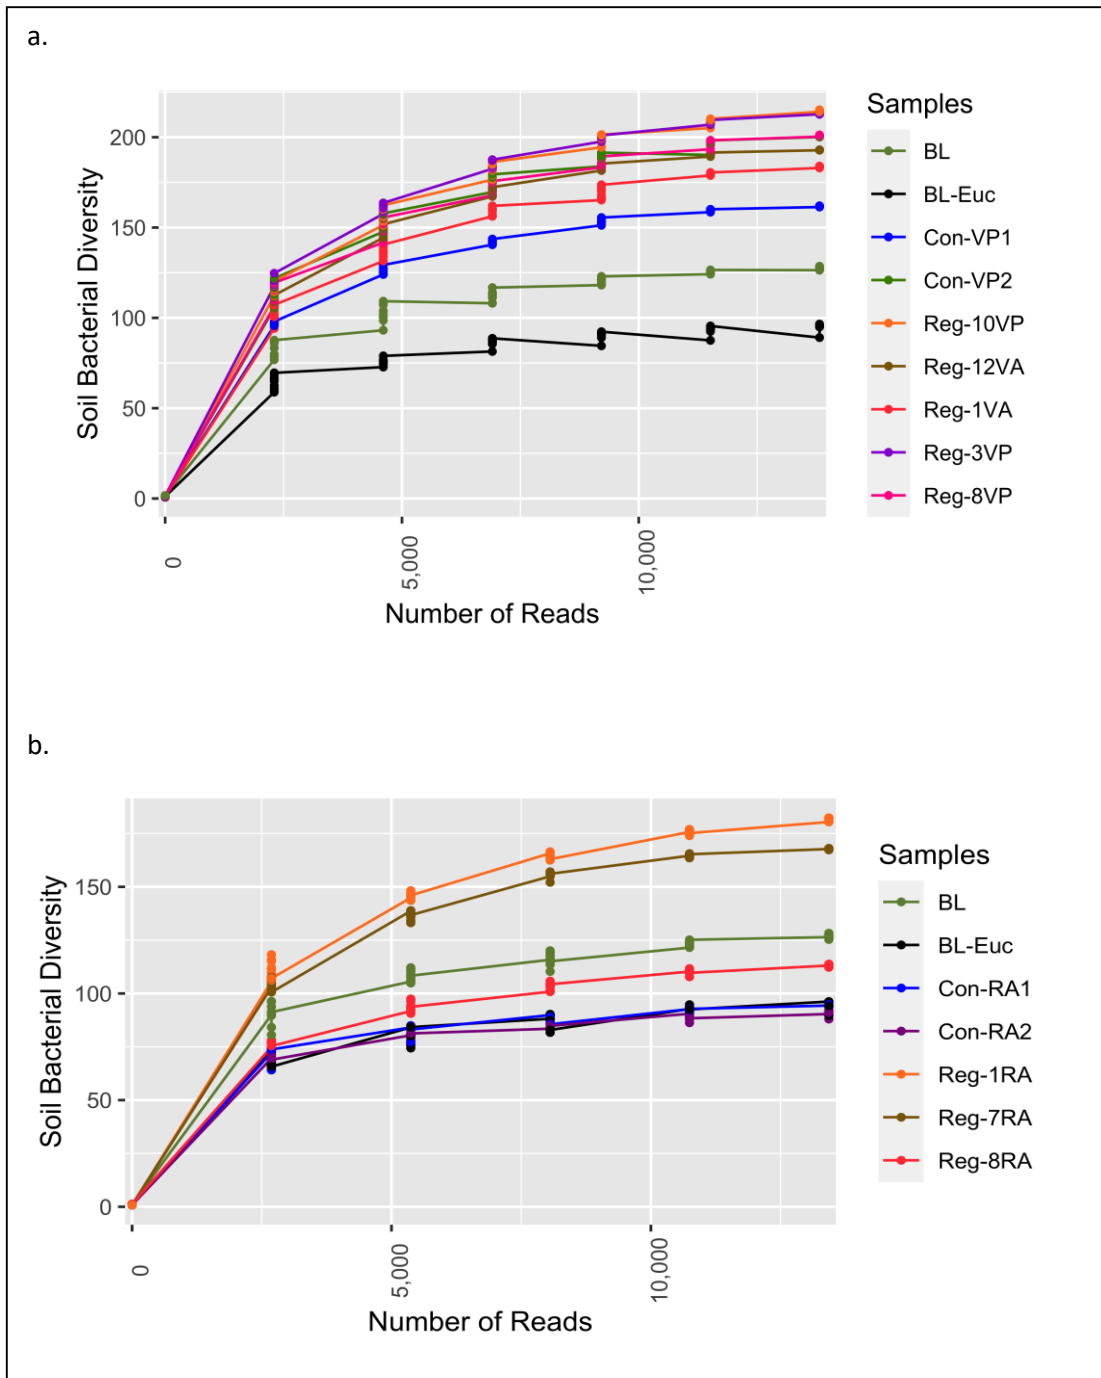

906 **Figure 2.** Alpha rarefaction study for soil bacterial diversity analysis of individual - **(a)** Vegetable

907 growing Regenerative and Conventional plots with Barren land (BL) and **(b)** Ragi growing *Reg* and

908 *Con* plots with BL.

909 **Figure 3**

910

911

912

913

914

915

916

917

918

919

920

921

922

923

924

925

926

927

928

929

930

931

932

933

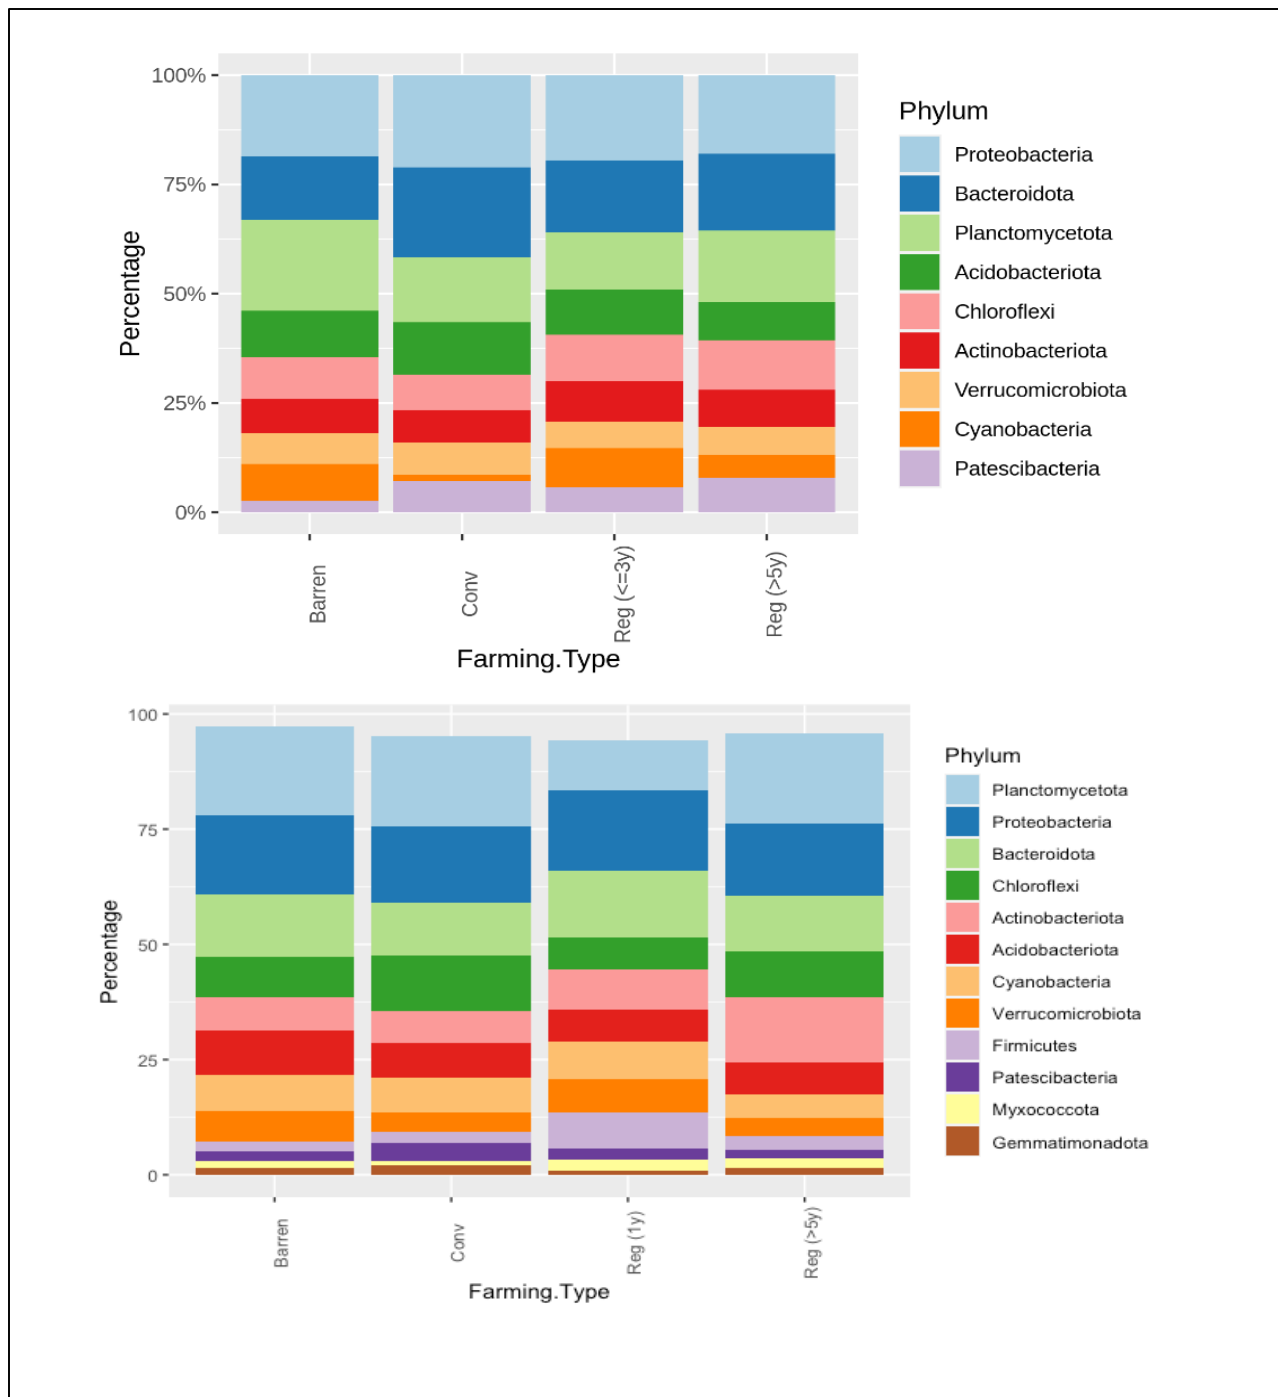

934 **Figure 3. (a)** Relative bacterial abundance at phylum levels in Conventional (*Conv*) and

935 Regenerative (*Reg*) agriculture plots and BL in **(a)** Vegetable plots and in **(b)** Ragi plots

936 **Figure 4**

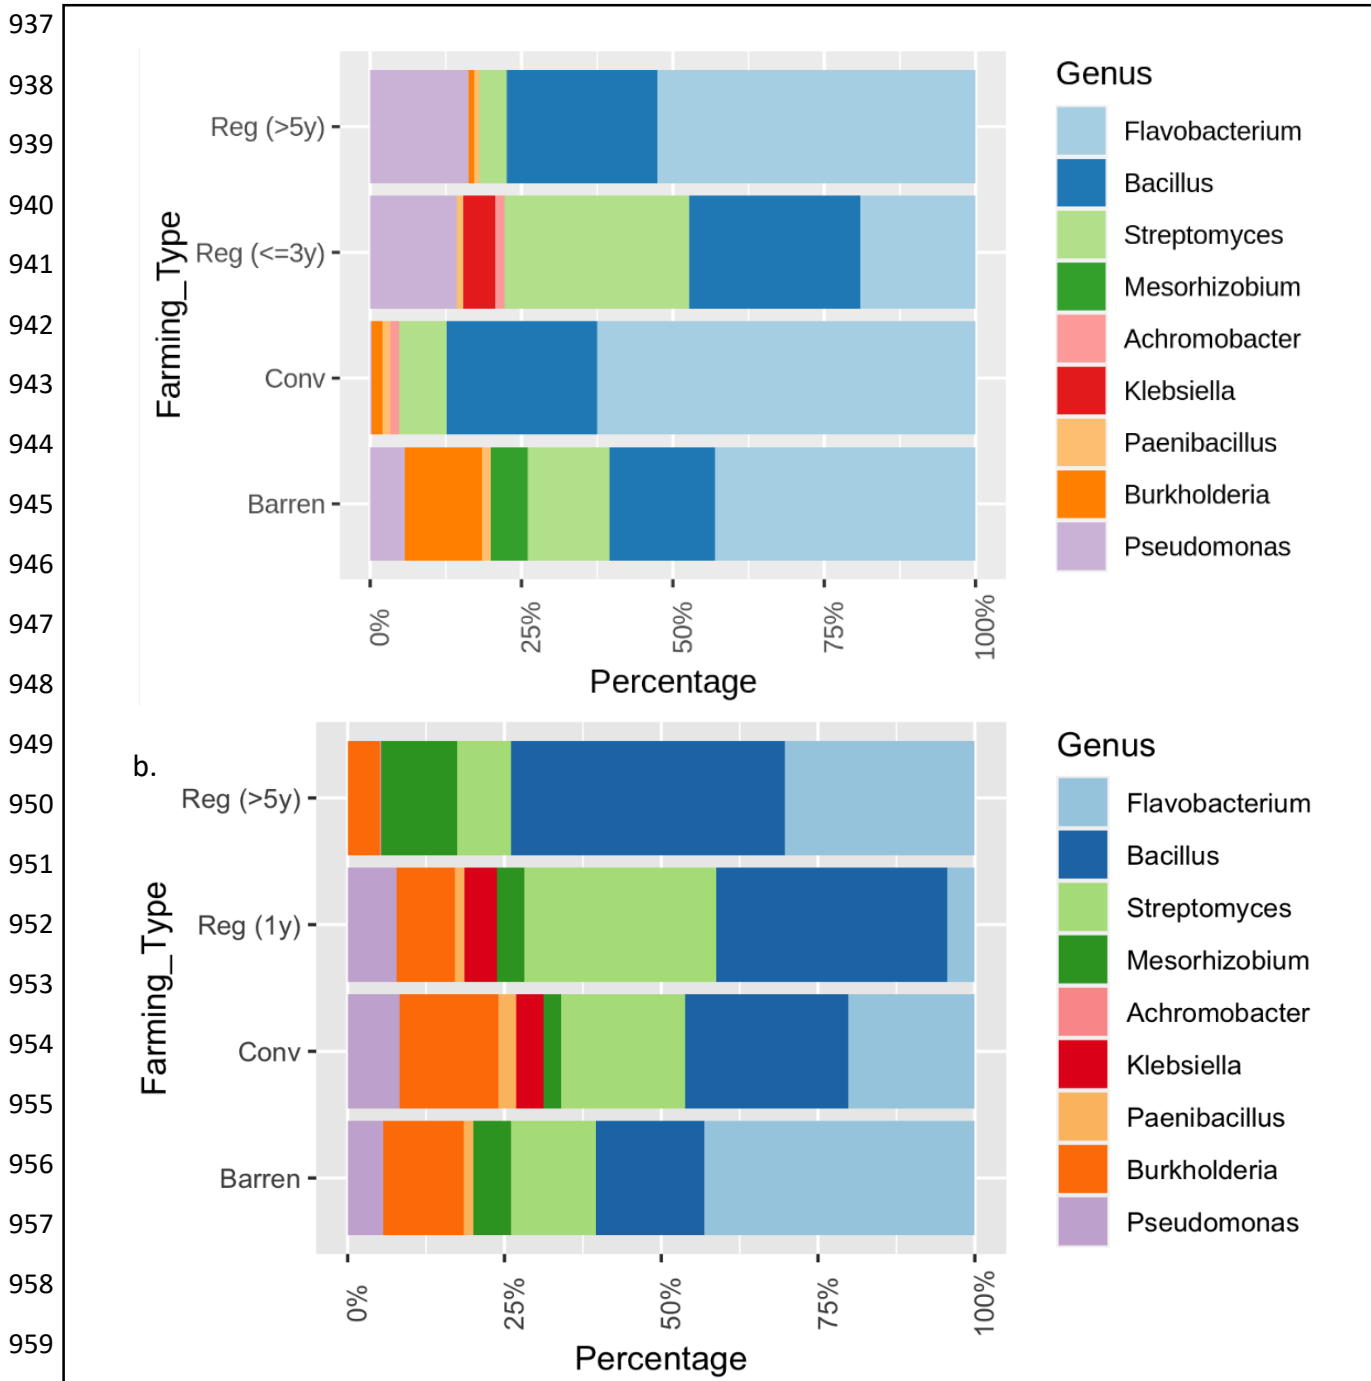

960 **Figure 4.** Relative composition of selected Plant Growth Promoting Rhizobacteria (PGPRs) in  
 961 different soil samples. **(a)** Comparing Vegetable growing Regenerative (*Reg*) and Conventional  
 962 (*Conv*) plots with BL and **(b)** Comparing ragi growing *Reg.* and *Conv.* plots with Barren.
